***Mycobacterium tuberculosis LprE enhances bacterial persistence by inhibiting cathelicidin and autophagy in macrophages***

***Short title:*** - Mtb LprE Facilitates Bacterial Survival by *CAMP* Down-regulation

Avinash Padhi<sup>1</sup>, Ella Bhagyaraj<sup>2</sup>, Mehak Zahoor Khan<sup>3</sup>, Mainak Biswas<sup>1</sup>, Srabasti Sengupta<sup>1</sup>, Geetanjali Ganguli<sup>1</sup>, Manaswini Jagadev<sup>1</sup>, Ananyaashree Behera<sup>1</sup>, Kaliprasad Pattanaik<sup>1</sup>, Ishani Das<sup>1</sup>, Pawan Gupta<sup>2</sup>, Vinay Kumar Nandicoori<sup>3</sup> and Avinash Sonawane<sup>1\*</sup>

<sup>1</sup>School of Biotechnology, Campus-11, KIIT University, Bhubaneswar, Odisha, India

<sup>2</sup>The Institute of Microbial Technology, Sector-39, Chandigarh, India

<sup>3</sup>National Institute of Immunology, New Delhi, India

\*Corresponding author

Email: [asonawane@kiitbiotech.ac.in](mailto:asonawane@kiitbiotech.ac.in) (AS)

**Keywords:** *Mycobacterium tuberculosis*, *M. smegmatis*, lipoprotein, cathelicidin, phago-lysosomal inhibition, autophagy, Toll like receptor-2

## ABSTRACT

*Mycobacterium tuberculosis*(*Mtb*) lipoproteins are known to facilitate bacterial survival by manipulating the host immune responses. Here, we have characterized a novel *Mtb* lipoprotein LprE(LprE<sub>Mtb</sub>), and demonstrated its role in mycobacterial survival. LprE<sub>Mtb</sub> acts by down-regulating the expression of cathelicidin, Cyp27B1, VDR and p38-MAPK via TLR-2 signaling pathway. Deletion of *lprE<sub>Mtb</sub>* resulted in induction of cathelicidin and decreased survival in the host. Interestingly, LprE<sub>Mtb</sub> was also found to inhibit autophagy mechanism to dampen host immune response. Episomal expression of LprE<sub>Mtb</sub> in non-pathogenic *Mycobacterium smegmatis*(*Msm*) increased bacillary persistence by down-regulating the expression of cathelicidin and autophagy, while deletion of LprE<sub>Mtb</sub> orthologue in *Msm* , had no effect on cathelicidin and autophagy expression. Moreover, LprE<sub>Mtb</sub> blocked phagolysosome fusion by suppressing the expression of EEA1, Rab7 and LAMP-1 endosomal markers by down-regulating IL-12 and IL-22 cytokines. Our results indicate that LprE<sub>Mtb</sub> plays an important role in mycobacterial pathogenesis in the context of innate immunity.

## INTRODUCTION

Tuberculosis (TB), caused by *Mycobacterium tuberculosis* (*Mtb*), is a widespread disease that kills more than 1.5 million people every year worldwide [1]. Macrophages, the primary resident cells of *Mtb*, are important components of innate defense mechanisms of the host. Macrophages play a crucial role in recognition, phagocytosis, and killing of invaders. Non-pathogenic mycobacteria such as *M. smegmatis* (*Msm*) are readily killed by the macrophages, whereas pathogenic mycobacteria (*Mtb*) employ various strategies to survive inside the macrophages like prevention of phago-lysosome fusion [2], autophagy inhibition [3], modulation of host cytokine production [4], inhibition of reactive oxygen and nitrogen species [5] and the manipulation of antigen presentation to prevent or alter the quality of T-cell responses [6].

Among the key effector molecules responsible for bacterial killing are antimicrobial peptides such as cathelicidin and defensins that are expressed in different cells such as neutrophils, macrophages, monocytes and epithelial cells [7]. In contrast to the multiple defensins, only one cathelicidin gene, *CAMP* (cathelicidin antimicrobial peptide), has been found in humans [8, 9]. The gene product human cationic antimicrobial peptide-18 (hCAP18) is transcribed from the *CAMP* gene that contains vitamin D response elements (VDRE) in its promoter and requires enzymatic digestion by human neutrophil proteinase 3 (PR3) to produce mature LL-37 that exhibit broad antimicrobial activity [10]. LL-37 is an amphipathic  $\alpha$ -helical peptide that binds to negatively charged groups of the bacterial outer membrane causing disruption of the bacterial cell wall [11]. Previously, we and other studies have shown that LL-37 is able to kill both non-pathogenic and pathogenic mycobacteria both *in vitro* and *in vivo* conditions [12, 13, 14].

Previously, it has been shown that vitamin D strongly up regulates the expression of cathelicidin [15]. The proposed model suggested that toll-like receptor-2/1 (TLR2/1) activation of macrophages induce the expression of CYP27B1 (25-hydroxyvitamin D-1 $\alpha$ -

hydroxylase) which, in turn, leads to the production of bioactive 1, 25(OH)<sub>2</sub>D from circulating inactive 25(OH) D [16]. The production of 1, 25(OH)<sub>2</sub>D activates *CAMP* gene expression through vitamin D receptor [17].

Bacterial lipoproteins are known to perform diverse functions such as host cell adhesion, cell invasion, nutrient transport, drug resistance and evasion of host defense mechanisms [18]. For example, *Streptococcus pneumoniae* PsaA lipoprotein is involved in the colonization of host cells and antibiotic resistance [19,20]. *Borrelia burgdorferi* VlsE lipoprotein is involved in bacterial persistence in host cells [21] and *Haemophilus influenzae* P6 lipoprotein activate host immune cells by inducing the secretion of pro-inflammatory cytokines through TLR-2 binding [22]. Similarly, bacterial lipoproteins have been shown to stimulate proliferation of B cells leading to increased immunoglobulin secretion [23]. Thus, bacterial lipoproteins are able to activate both the innate and adaptive wings of the immune system. Mycobacterium genome encodes for 99 lipoproteins, however, the functions of many of them are still unknown. Several of them have been shown to play a major role in virulence [16, 24, and 25]. *Mtb* PstS-1, a 38 kDa lipoprotein, is involved in phosphate transport as well as in inducing apoptosis [25]. Deletion mutants of *Mtb lgt* and *lsp* showed a significant reduction in virulence [26]. Similarly, an extensively studied *Mtb* 19-kDa lipoprotein (LpqH) has been shown to strongly induce the innate immunity by activating cathelicidin mediated autophagy in a TLR-2 dependent manner [24,16]. LpqH binds to TLR-2 that leads to activation of cytokines such as interleukin-12 (IL-12), interleukin-1 beta (IL-1β) and tumor necrosis factor-alpha (TNF-α). Moreover, LpqH also plays a pivotal role in bacterial survival by inhibiting interferon-gamma (IFN-γ) response genes such as *CIITA* (Class II trans activator) that leads to reduced antigen presentation [24]. Another study has shown that a synthetic 19-kDa *Mtb* derived lipopeptide enhances the antimicrobial capacity of monocytes via TLR2/1 signaling, vitamin D and VDR-dependent pathway [27]. This involved induction

of the *CAMP* gene and its protein [28]. Some of the lesser studied mycobacterial lipoprotein genes include LprG, LprA, LpqB, and LpqM.

In the present study, we have shown that one of the *Mtb* lipoproteins, LprE (LprE<sub>Mtb</sub>), is involved in intracellular bacterial survival and evasion of host immune responses. We demonstrate that LprE<sub>Mtb</sub> enhances bacillary survival by inhibiting the expression of *CAMP* via TLR-2-p38-Cyp27B1-VDR signaling pathway in human macrophages. We also demonstrate that LprE<sub>Mtb</sub> downregulates the pathogen induced IL-1 $\beta$  pro-inflammatory response. Furthermore, mechanistic studies showed that LprE<sub>Mtb</sub> inhibits autophagy and phago-lysosome fusion by down-regulating the expression of several endosomal markers such as Early Endosome Antigen 1 (EEA1), Rab7 and lysosomal-associated membrane protein 1 (LAMP-1), and IL-12 and IL-22 cytokines, thus aid bacterial survival in human macrophages. In summary, we have characterized a novel *Mtb* lipoprotein that aids bacterial survival in host macrophages by down-regulating the expression of antimicrobial peptide cathelicidin.

## RESULTS

### Genetic organization of LprE in *M. tuberculosis* genome

Initial annotation from the Tuberculist Web server suggested that *Mtb* H37Rv LprE (LprE<sub>Mtb</sub>), encoded by a 609 bp *Rv1252c* gene, belongs to a previously uncharacterized *Rv\_dir301* operon (webTB.org database). This operon consists of yet another uncharacterized *Rv1251c* gene (**Fig 1A**). In *Mtb* CDC1551, a clinical isolate, LprE is encoded by an *MT1291* gene (**Fig 1B**). Multiple sequence alignment and BLAST results showed 100% sequence homology between *Mtb* H37Rv and *Mtb* CDC1551 *LprE* genes (**Suppl Fig 1**). The tertiary structure of LprE is not available. Therefore, we predicted its structure using a Modeller program. The LprE sequence showed high structural homology (94.5%) with human mitochondrial RNA polymerase (PDB ID: 3SPA) (**Fig 1C**). Domain analysis by ProDom

program (<http://www.prodom.prabi.fr/>) showed the presence of a conserved lipoprotein binding domain at amino acids 81-201 position (data not shown). To further confirm that LprE is a lipoprotein, we aligned LprE<sub>Mtb</sub> with *Escherichia coli* outer membrane lipopolysaccharide transport lipoprotein LptE (PDB ID: 4NHR). We observed 100% homology between lipoprotein binding domains of LprE<sub>Mtb</sub> and *E. coli* LptE proteins (**Fig 1D**).

### **Deletion of *LprE* in *M. tuberculosis* CDC1551 decreased bacterial survival in human macrophages**

Pathogenic mycobacteria employ various strategies to survive and replicate inside the host cells. Earlier reports showed that *Mtb* lipoproteins play a crucial role in the intracellular survival of bacteria and that deletion of lipoproteins decrease *Mtb* virulence [26, 29]. Therefore, we investigated the role of LprE<sub>Mtb</sub> in bacterial survival. Towards this, THP-1 cells were infected with *Mtb*, *Mtb*Δ*LprE*, and the complemented *Mtb*Δ*LprE*::*LprE* strains. Cells were lysed at 12, 24, 48 and 72 h post infection and the intracellular bacterial survival was determined. While *Mtb* and *Mtb*Δ*LprE*::*LprE* strains showed a time dependent increase in intracellular bacterial burden, significant decrease was observed when THP1 cells were infected with *Mtb*Δ*LprE* (**Fig 2A**). These results suggest a pivotal role for LprE<sub>Mtb</sub> in the survival of *Mtb* inside macrophages.

To further confirm the role of LprE in bacterial survival, LprE<sub>Mtb</sub> was episomally expressed in non-pathogenic *Msm* (*Msm*::*LprE*) with the help of pSMT3 shuttle vector. Several studies including our previous work have used *Msm* as a surrogate model to study the role of various *Mtb* proteins in pathogenesis [30-34]. The qRT-PCR analysis confirmed that *LprE* is ectopically expressed in *Msm* strain grown under *in-vitro* condition (**Fig 2B**). As shown *lprE*<sub>Mtb</sub> level reached a maximum at 24 h followed by a gradual decrease in expression

level upto 72 h. The transcript levels were normalized with *Msm* housekeeping *sigA* at 2 h and the fold changes were calculated.

*Msm* genome analysis showed presence of *MSMEG\_5043*, an ortholog of  $LprE_{Mtb}$  [35]. To preclude the effect of *MSMEG\_5043*, we first constructed *Msm* $\Delta$ 5043 mutant by allelic exchange method (**Fig 2C**). Deletion of *MSMEG\_5043* was confirmed by PCR using gene specific and flanking region primers (**Suppl Fig 2A**). *Msm* $\Delta$ 5043 strain was electroported with pSMT3- $LprE_{Mtb}$  construct to generate a *Msm* $\Delta$ 5043::*LprE* complementation strain. We did not observe significant difference in the *in vitro* growth pattern of *Msm*::pSMT3, *Msm*::*LprE*, *Msm* $\Delta$ 5043 and *Msm* $\Delta$ 5043::*LprE* strains (**Suppl Fig 2B**). These results are consistent with the growth pattern observed for *Mtb*, *Mtb* $\Delta$ *LprE*, and *Mtb* $\Delta$ *LprE*::*LprE* strains (data not shown), suggesting that the presence or absence  $LprE_{Mtb}$  does not impact on the bacterial growth kinetics. In contrast, when compared with *Msm*::pSMT3 and *Msm* $\Delta$ 5043, the intracellular survival of *Msm*::*LprE* and *Msm* $\Delta$ 5043::*LprE* strains in THP1 cells was 10-15 fold higher after 24 and 48 h of post-infection (**Fig 2D**). However, intracellular count of *Msm* $\Delta$ 5043::*LprE* was observed to be 3 fold less when compared to *Msm*::*LprE* 48 h post infection ( $p < 0.0001$ ; **Fig 2D**). To corroborate above results, we determined the intracellular survival of bacteria 24 h post infection with the help of flow cytometry. Cells were harvested 24 h post infection, lysed to release the intracellular bacteria and stained with propidium iodide (PI), a non-permeable nucleic acid binding dye that binds specifically to dead or with disintegrated cell wall bacteria. Flow cytometry analysis showed less PI stained *Msm*::*LprE* and *Msm* $\Delta$ 5043::*LprE* bacteria as compared with *Msm*::pSMT3 and *Msm* $\Delta$ 5043 strains (**Fig 2E**), indicating less death in  $LprE_{Mtb}$  expressing *Msm* strains.

Consistent with above results *Msm::LprE* and *MsmΔ5043::LprE* also showed increased intracellular survival in human monocyte derived macrophages as compared to *Msm::pSMT3* and *MsmΔ5043* strains (**Fig 2F**). We did not observe any difference in the phagocytosis rate of *Msm::pSMT3*, *Msm::LprE*, *MsmΔ5043* and *MsmΔ5043::LprE* strains (**Fig 2G**) indicating that the increased survival of *Msm::LprE* and *MsmΔ5043::LprE* strains is not due to the difference in the uptake of bacteria by macrophages.

### **LprE<sub>Mtb</sub> inhibits cathelicidin expression in human macrophages**

Macrophages exhibit antimicrobial response by inducing the expression of cationic antimicrobial peptide cathelicidin (hCAP18/LL-37) [36]. However, *Mtb* is known to down regulate the expression of cathelicidin to avoid killing by macrophages [37]. Previously, it has been shown that 19-kDa lipoprotein from *Mtb* interacts with TLR-2, which subsequently up-regulates the expression of Cyp27B1 hydroxylase, VDR translocation into the nucleus and finally the induction of cathelicidin expression [14]. Our previous study also showed that cathelicidin is able to kill both pathogenic and non-pathogenic mycobacteria under *in vitro* and *ex vivo* conditions [13]. Therefore, we first evaluated the expression of *CAMP*, which encodes human cathelicidin, in *Mtb*, *MtbΔLprE*, and *MtbΔLprE::LprE* infected THP-1 cells. We observed an ~4-fold increase in *CAMP* expression in cells infected with *MtbΔLprE* compared with *Mtb* and *MtbΔLprE::LprE* infected cells (**Fig 3A**). In contrast, *Msm::LprE* and *MsmΔ5043::LprE* infection of THP1 cells resulted significant down-regulation of *CAMP* expression when compared with *Msm::pSMT3* and *MsmΔ5043* infected cells (**Fig 3B**). These results suggest that LprE<sub>Mtb</sub> is involved in the inhibition of cathelicidin expression, which in turn promotes the bacterial survival. To further validate the role of cathelicidin, we evaluated bacterial survival in THP-1 cells treated with 50 μg/ml of LL-37 2 h before (pre-treatment) and after (post-treatment) the infection. Earlier we have shown that



treatment with cathelicidin (50 µg/ml) would eliminate *Mtb* under *in vitro* and *ex vivo* conditions without exhibiting any toxic effect on macrophages [13]. Furthermore we established that *Msm* elimination is dependent on cathelicidin expression [13]. In agreement with our previous data, we observed increased killing of *Msm::LprE* and *MsmΔ5043::LprE* under both pre and post-treated conditions in comparison with untreated cells (**Fig 3C**). However, more bacterial killing was observed under post-treated condition. As expected treatment with 50 µg/ml LL-37 did not show any cytotoxic effect on THP-1 cells (data not shown).

Vitamin D3 is a known inducer of cathelicidin, which results in increased bacterial killing in human macrophages [38]. As shown in Figure 3D, treatment with 20 nM Vitamin D3 further reduced *Msm::pSMT3* and *MsmΔ5043* survival compared with untreated cells (**Fig 3D**), whereas we observed no difference in the cfu's of *Msm::LprE* and *MsmΔ5043::LprE* (**Fig 3D**), suggesting that  $LprE_{Mtb}$  impedes the vitamin D3 mediated response.

### **LpqH<sub>Mtb</sub> and LprE<sub>Mtb</sub> antagonistically regulate CAMP expression**

Mycobacterium genome encodes for 90 lipoproteins. Among them, 19-KDa lipoprotein LpqH<sub>Mtb</sub> has been shown to induce cathelicidin expression to restrict intracellular mycobacterial growth [16]. Therefore, we investigated the impact of LpqH<sub>Mtb</sub> on the modulation of *CAMP* expression in presence of  $LprE_{Mtb}$ . Towards this, we co-expressed LpqH<sub>Mtb</sub> and  $LprE_{Mtb}$  in *Msm* to generate a recombinant *Msm::LprE-LpqH* strain. *Msm* expressing LpqH<sub>Mtb</sub> (*Msm::LpqH*) and  $LprE_{Mtb}$  (*Msm::LprE*) were used as control strains. In agreement with the previous report, we also observed increased *CAMP* expression in *Msm::LpqH* infected cells [16], whilst *Msm::LprE* infection inhibited *CAMP* expression. However, infection with LpqH<sub>Mtb</sub> and  $LprE_{Mtb}$  co-expressing *Msm* strain (*Msm::LprE-LpqH*) showed the *CAMP* level in between LpqH<sub>Mtb</sub> and  $LprE_{Mtb}$  expressing *Msm* strains (**Fig 3E**),

suggesting that both LpqH and LprE are strong regulators of cathelicidin expression. Moreover, *Msm::LpqH* and *Msm::LprE-LpqH* strains showed decreased survival in comparison with *Msm::LprE* strain after 24 ( $p < 0.05$ ) and 48 ( $p < 0.0001$ ) h of infection (**Fig 3F**).

### **LprE<sub>Mtb</sub> inhibits cathelicidin via p38 MAPK pathway in macrophages**

Based on above observations, our subsequent studies were focused on the investigation of the molecular mechanism(s) that are responsible for the down-regulation of *CAMP* expression by LprE<sub>Mtb</sub>. It has been reported that LpqH<sub>Mtb</sub> and TLR-2 interaction regulate *CAMP* expression via activation of downstream p38 MAPK signaling pathway [14]. Mycobacterial antigen-TLR 2 interaction activates p38 MAPK signaling pathway dependent modulation of 25-hydroxyvitamin D-1 $\alpha$ -hydroxylase (CYP27B1), which convert inactive 25(OH) D to active form 1,25(OH)<sub>2</sub>D of vitamin D [27]. The latter then binds to vitamin D receptor (VDR) to activate the transcription of the *CAMP* gene (**Fig 3G**). We observed a significant increase in the expression of phospho-p38 in *Mtb* $\Delta$ *LprE* infected cells when compared with *Mtb* and *Mtb* $\Delta$ *LprE::LprE* at 6 h post-infection, however, no such significant difference was observed at 12 h post-infection (**Fig 3H**) indicating that LprE<sub>Mtb</sub> modulates phospho-p38 during the early infection process. Similarly, phospho-p38 expression was found to be moderately decreased in *Msm::LprE* and *Msm* $\Delta$ *5043::LprE* infected macrophages as compared with *Msm* $\Delta$ *5043* at 6 h post infection (**Suppl Fig 3A**). This is in agreement with the previous study that *Mtb* infection down-regulates phospho-p38 [39].

### **LprE<sub>Mtb</sub> down-regulates CYP27B1 and VDR expression in macrophages**

Next, we studied the expression of cathelicidin regulation pathway intermediates CYP27B1 and the VDR. Increased expression of CYP27B1 was observed at both transcriptional (**Fig**

**3I)** and translational levels (**Fig 3J**) in *Mtb* $\Delta$ *LprE* infected macrophages as compared to *Mtb* and *Mtb* $\Delta$ *LprE::LprE* infected cells. Of note, CYP27B1 expression was found to be increased both at 12 and 24 h post-infection (**Fig 3J**). On the other hand, the expression of CYP27B1 was found to be significantly down-regulated at both transcriptional (**Suppl Fig 3B**) and translational (**Suppl Fig 3C**) levels in *Msm::LprE* and *Msm* $\Delta$ *5043::LprE* infected cells relative to *Msm::pSMT3* and *Msm* $\Delta$ *5043* infected macrophages.

Similarly, the expression of VDR was found to be significantly up-regulated at both transcriptional (**Fig 3K**) and translational (**Fig 3J**) levels in *Mtb* $\Delta$ *LprE* infected macrophages as compared to *Mtb* and *Mtb* $\Delta$ *LprE::LprE* infected cells. In contrast, infection with *Msm::LprE* and *Msm* $\Delta$ *5043::LprE* strains down-regulated VDR expression at both transcriptional (**Suppl Fig 3D**) and translational (**Suppl Fig 3E**) levels. Altogether these results indicate that  $LprE_{Mtb}$  inhibits the expression of *CAMP* through down-regulation of p38-Cyp27B1-VDR signaling pathway to augment bacterial survival in macrophages.

### **$LprE_{Mtb}$ down-regulate the expression of *CAMP* via TLR-2**

Previous studies have shown that lipoproteins regulate cathelicidin expression through TLRs [40,41]. To identify the involvement of specific TLR in the regulation of *CAMP* expression, we first determined *in-silico* binding efficiency of  $LprE_{Mtb}$  with human TLR-1,2,4 and 6. For this, we first performed docking analysis of energy minimized  $LprE_{Mtb}$  protein with human TLR's tertiary structure obtained from PDB database.  $LprE_{Mtb}$  showed strong binding efficiency with TLR-2 (-582.21) as compared to TLR-1 (-223.5), TLR-4 (2.89) and TLR-6 (-10.59) (**Suppl Fig 4A**), as determined by atomic contact energy (ACE) score obtained from PatchDock analysis [42].

To validate the *in-silico* data, we silenced TLR's using siRNAs specific to human TLR-1,2,4 and 6 in THP-1 cells. Semi-quantitative RT-PCR analysis showed more than 80% knock-down efficiency in siRNA treated cells (**Fig 4A**). Then untreated, scrambled and TLR

specific siRNA treated THP-1 cells were infected with *Msm::pSMT3*, *MsmΔ5043* and *MsmΔ5043::LprE* bacteria and intracellular bacterial survival were determined. Interestingly, we observed a substantial decrease in the survival of *MsmΔ5043::LprE* in TLR-2 silenced macrophages as compared with TLR-1, 4 and 6 silenced macrophages (**Fig 4B**). Moreover, *MsmΔ5043::LprE* bacterial count was found to be approximately 1.5-fold less in TLR-1 siRNA treated cells in comparison with TLR-4 and 6 silenced macrophages (**Fig 4B**). This correlates well with the high ACE score observed in docking studies of  $LprE_{Mtb}$  with TLR-1 in comparison to TLR-4 and 6. We also checked the expression of *CAMP*, *Cyp27B1* and *VDR* in TLR-1,4,2 and 6 silenced plus *Msm::pSMT3*, *MsmΔ5043* and *MsmΔ5043::LprE* infected macrophages. We observed significant increase in the expression of *CAMP*, *Cyp27B1* and *VDR* (**Fig 4C-E**) in *MsmΔ5043::LprE* infected samples when TLR-2 was silenced in comparison with scrambled siRNA treated and untreated cells. No difference in the expression of *CAMP* was observed in TLR-1,4 and 6 silenced macrophages (**Suppl Fig 4B**). Consistent with the above data *MsmΔ5043::LprE* infection still showed down-regulation of *CAMP* in TLR-1, 4 and 6 silenced macrophages (**Suppl Fig 4B**). These results unambiguously suggest that  $LprE_{Mtb}$  regulates *CAMP* expression through TLR-2 signaling pathway.

### **$LprE_{Mtb}$ inhibits the production of pro-inflammatory cytokine IL-1 $\beta$**

IL-1 $\beta$  cytokine induces the expression of antimicrobial peptides through TLR signaling to clear the bacterial infection [43]. Active TB patients showed reduced levels of IL-1 $\beta$  suggesting that it may have a protective role in TB infection [44]. Next, we investigated the expression of IL-1 $\beta$  in *Mtb*, *MtbΔLprE*, and *MtbΔLprE::LprE* infected macrophages. qRT-PCR analysis showed significant up-regulation of IL-1 $\beta$  level in *MtbΔLprE* infected macrophages in comparison with *Mtb* and *MtbΔLprE::LprE* infected cells after 12 (p<0.0001) and 24 h (p<0.0001) of infection (**Fig 5A**). However, no difference in the

expression levels of IL-1 $\beta$  was observed after 48 h of infection. In contrary, LprE<sub>Mtb</sub> expressing *Msm::LprE* and *Msm $\Delta$ 5043::LprE* infected cells showed reduced expression of IL-1 $\beta$  at both 12 and 24 h post-infection (**Fig 5B**).

In macrophages, processing and release of active IL-1 $\beta$  are dependent on caspase-1 activation [45]. Therefore, we investigated whether LprE<sub>Mtb</sub> mediated IL-1 $\beta$  down-regulation is dependent on caspase activation. Indeed, western blot analysis showed an increased level of cleaved caspase-1 in *Mtb $\Delta$ LprE* infected macrophages when compared with *Mtb* and *Mtb $\Delta$ LprE::LprE* infected cells after 12 h of infection (**Fig 5C**). Together data suggests that LprE<sub>Mtb</sub> suppresses caspase-1 dependent IL-1 $\beta$  production to facilitate bacterial persistence in macrophages.

### **LprE<sub>Mtb</sub> inhibits autophagy to dampen host immune response**

Autophagy is a known host defense mechanism that plays an important role in the restriction of *Mtb* growth [46]. To investigate if LprE<sub>Mtb</sub> modulates autophagy, we evaluated the expression of several autophagic markers such as microtubule-associated protein 1 light chain 3 (LC3), ATG-5 and Beclin-1 in *Mtb*, *Mtb $\Delta$ LprE* and *Mtb $\Delta$ LprE::LprE* infected THP-1 cells. Western blot analysis showed the increased conversion of LC3-I to a characteristic autophagic induction marker LC3-II in *Mtb $\Delta$ LprE* infected cells (**Fig 6A**). We also examined the expression of an autophagic flux marker p62(SQSTM1) [47]. As shown in **Fig 6A**, p62 level decreased in case of *Mtb $\Delta$ LprE* infected macrophages (**Fig 6A**). Moreover, the expression of other autophagic markers such as Atg-5 and Beclin-1, which are recruited to the phagosomal compartments during autophagic vesicle formation [48], were also found to be increased in *Mtb $\Delta$ LprE* infected cells as compared to *Mtb* and *Mtb $\Delta$ LprE::LprE* infected cells (**Fig 6B**).

To further confirm the role of LprE<sub>Mtb</sub> in autophagy inhibition, we also checked the expression of LC3, p62, Atg-5 and Beclin-1 in *Msm::pSMT3*, *Msm::LprE*, *MsmΔ5043* and *MsmΔ5043::LprE* infected macrophages. Consistent with above results, infection with both LprE<sub>Mtb</sub> expressing *Msm::LprE* and *MsmΔ5043::LprE* strains significantly reduced the expression of LC3, Atg-5 and Beclin-5 (**Suppl Fig 5A & B**). On the other hand, p62 expression was found to be upregulated under similar conditions. Rapamycin is a known inducer of autophagy mechanism. Next, we checked if autophagy induction by rapamycin treatment exerts any impact on the outcome of bacterial survival. For this, THP-1 cells were pre-treated with rapamycin (50 nM) followed by infection with *Msm::LprE* and *MsmΔ5043::LprE* strains and the intracellular bacterial count was determined after 24 h of infection. Rapamycin treatment significantly reduced the survival of *Msm::LprE* and *MsmΔ5043::LprE*, which otherwise showed more survival by down-regulating the expression of autophagy, as compared to untreated cells (**Fig 6C**). We confirmed that rapamycin treatment indeed induced autophagy by determining the expression of LC3-II and Atg-5 by western blots analysis (**Fig 6D**).

### **LprE<sub>Mtb</sub> blocks phago-lysosome fusion by down-regulating the expression of endosomal markers**

Non-pathogenic mycobacteria containing phagosomes readily fuse with lysosomes leading to the elimination of pathogen; however, pathogenic mycobacteria inhibit the fusion of phagosomes with lysosomes to survive in macrophages for an extended period of time. Previously, we have shown that exogenous administration of cathelicidin increased the co-localization of *M. bovis*-BCG containing phagosomes with lysosomes resulting in increased bacterial killing [11]. Based on these observations, we extended our study to investigate whether LprE<sub>Mtb</sub> also affects the phagosome maturation and subsequently phago-lysosome fusion. For this, we checked the expression of early endosomal antigen 1 (EEA1), Rab7 and

lysosomal associated marker protein-1 (LAMP-1) proteins, which are the hallmarks of early, late and lysosomal compartments, in THP-1 cells infected with *Mtb*, *Mtb* $\Delta$ *LprE*, and *Mtb* $\Delta$ *LprE::LprE* strains. It has been shown that recruitment of these marker proteins on endocytic compartments is necessary for the sequential maturation of endosomes and phago-lysosome fusion [49,50]. Western blot analysis showed a significant increase in the levels of EEA1, Rab7 and LAMP-1 in *Mtb* $\Delta$ *LprE* infected cells in comparison to *Mtb* and *Mtb* $\Delta$ *LprE::LprE* infected cells (**Fig 7A &B**). On the other hand, macrophages infected with *LprE*<sub>Mtb</sub> expressing *Msm* strains showed decreased expression of these endosomal markers (**Suppl Fig 6A**).

### ***LprE*<sub>Mtb</sub> arrest phago-lysosome maturation by down-regulating the expression of IL-12 and IL-22 cytokines**

Upon mycobacterial infection cytokines strongly influence the outcome of infection. Cytokines individually or in combined fashion create a microenvironment that assists in the control of mycobacteria. Several cytokines have been shown to promote acidification of phagosomes to facilitate phago-lysosomal fusion and thus bacterial death. Other studies have shown that interleukin-12 (IL-12) and IL-22 cytokines play a critical role in phagosome maturation by promoting an acidification of the bacteria containing phagosomes [51,52]. IL-22 has been shown to enhance Rab7 expression in *Mtb* infected macrophages, thus enhancing phago-lysosomal fusion. Therefore, we investigated the expression of these two cytokines in infected THP-1 cells. As can be seen in **Figure 7C** transcript levels of IL-12 was elevated in a time dependent manner in macrophages infected with *Mtb* $\Delta$ *LprE* as compared to *Mtb* and *Mtb* $\Delta$ *LprE::LprE* strains. On the contrary, *Msm::LprE* infected cells showed reduced IL-12 expression as compared to vector control *Msm::pSMT3* infected cells (**Suppl Fig 6B**). The IL-22 level also increased by more than 2-fold in macrophages infected with the *Mtb* $\Delta$ *LprE*



(**Fig 7D**), while *Msm::LprE* and *Msm $\Delta$ LprE::LprE* infected condition significantly reduced IL-22 transcript levels (**Suppl Fig 6C**). These results indicate that LprE<sub>Mtb</sub> probably blocks phagosomal maturation by down-regulating the expression of IL-12 and IL-22 cytokines.

## DISCUSSION

*Mtb* exhibits an extraordinary ability to survive inside the host cells. This is mainly attributed to the plethora of virulence factors produced by the bacterium. One of the most important classes of virulence factors produced by *Mtb* is lipoproteins. Of the 99 lipoproteins predicted in the mycobacterium genome, only a few of them have been functionally characterized. In this study, we have characterized one of the lipoproteins LprE, encoded by *Rv1252c* in H37Rv and *MT1291* in CDC1551 strains, and investigated its role in mycobacterial virulence. Analysis of genetic organization of *Mtb* genome showed that *Rv1252c* is a part of a previously uncharacterized *Rv\_dir301* operon. Sequence analysis revealed 100% homology between *lprE* gene from H37Rv and CDC1551 strains. LprE structural analysis showed the presence of alpha helices, random coils and N-terminal lipoprotein binding domain between 81-201 amino acids. Further domain analysis showed a perfect match between the binding domain sequences of LprE<sub>Mtb</sub> and LptE lipoprotein from *E.coli*. The previous study by Sutcliffe *et.al.* also predicted LprE<sub>Mtb</sub> as a lipoprotein on the basis of the presence of G+Lpp pattern match, Lipobox and type II signal peptide sequence [53]. These data provide sufficient evidences that LprE<sub>Mtb</sub> could be a lipoprotein. However further biochemical analysis is required to confirm that LprE<sub>Mtb</sub> is indeed a lipoprotein.

*Mtb* is considered as one of the most successful pathogens due to its ability to evolve with numerous survival strategies. However, non-pathogenic *Msm* is readily killed by macrophages. Here, we employed two strategies to understand the role of LprE in *Mtb* pathogenesis. First, we used a *Mtb* LprE deletion mutant (*Mtb $\Delta$ LprE*). Secondly, we used



*Msm* as a surrogate model to express LprE<sub>Mtb</sub> (*Msm::LprE*). To ensure that the observed phenotype is indeed due to ectopic expression of LprE in *Msm*, we deleted *MSMEG\_5043*, a LprE<sub>Mtb</sub> orthologue present in *Msm* genome, to generate *Msm*Δ5043 strain. Infection assays with primary human macrophages and THP-1 cells showed that *lprE<sub>Mtb</sub>* expression increased the survival of *Msm*, while deletion of LprE significantly reduced the *Mtb* survival in macrophages suggesting that LprE<sub>Mtb</sub> is involved in bacterial persistence in macrophages.

*Mtb* employs various immune evasion strategies to survive inside the macrophages. The antimicrobial peptide cathelicidin/LL-37 is known to play a significant role in innate response against *Mtb* infection [14,54]. Gutierrez *et al.* (2008) have shown that *Msm* infected macrophages differentially expressed a set of genes including cationic AMPs [55]. Our previous study has shown that *Msm* infection up-regulated the expression of cathelicidin in macrophages that led to the intracellular killing of bacteria. Moreover, we and others have shown that cathelicidin is able to kill *M. bovis*-BCG and *Mtb* H37Rv under *in-vitro* and *ex-vivo* growth conditions [13]. We observed that *Msm::LprE* and the complemented *Msm*Δ5043::*LprE* strains survived better in human macrophages by down-regulating the expression of cathelicidin, while deletion of *LprE* de-repressed the cathelicidin expression thereby resulting in increased *Mtb* killing. External supplementation of purified LL-37 peptide decreased *Msm::LprE* and *Msm*Δ5043::*LprE* bacterial counts confirming that the increased survival was due to LprE<sub>Mtb</sub> mediated down-regulation of cathelicidin levels. Transcriptional down regulation of *CAMP* during bacterial infection was suggested as a novel mechanism to escape the immune responses [56,57,58]. LprE<sub>Mtb</sub> was also found to inhibit the expression of cathelicidin signaling pathway intermediates such as CYP27B1 and VDR to subvert the Vitamin D3 mediated bacterial killing. Together, these findings argue that LprE<sub>Mtb</sub> is responsible for the down-regulation of cathelicidin thus promoting bacterial survival in macrophages. Unlike LprE, LpqH<sub>Mtb</sub> was shown to induce the expression of

cathelicidin [16]. Infection assays with *Msm* strain co-expressing both LpqH<sub>Mtb</sub> and LprE<sub>Mtb</sub> (*Msm::LprE-LpqH*) showed intermediate survival and cathelicidin expression indicating that both LpqH<sub>Mtb</sub> and LprE<sub>Mtb</sub> are antagonistic regulators of cathelicidin expression.

One of the proposed mechanisms for cathelicidin induction is that bacterial exposure leads to activation of downstream p38 MAPK signaling pathway [16,54], which subsequently up regulates CYP27B1 hydroxylase, VDR and finally cathelicidin [16]. Indeed, our results demonstrated that *Mtb*Δ*LprE* infection caused up-regulation of p38 MAPK, CYP27B1, and VDR. On the other hand infection with LprE expressing *Mtb*, *Mtb*Δ*LprE::LprE*, *Msm::LprE* and *Msm*Δ*5043::LprE* strains down-regulated p38 MAPK, CYP27B1, and VDR. These results suggest that LprE<sub>Mtb</sub> mediate cathelicidin suppression via inhibition of p38-Cyp27B1-VDR signaling pathway. Previous reports have shown that few intracellular bacteria have the ability to dysfunction the vitamin D receptor, thus make host cells more susceptible to bacterial infections [59,60]. We observed that LprE<sub>Mtb</sub> inhibits VDR and that treatment with an active form of Vitamin D3 further increased the killing of LprE<sub>Mtb</sub> expressing mycobacterial strains indicating a possible mechanism of immunosuppression employed by the bacteria for intracellular survival.

Pro-inflammatory cytokine IL-1β is known for a protective immune action against mycobacteria [61]. IL-1β functions in synergy with LL-37 to augment the host immune responses against pathogenic bacteria [62]. Expression of LprE<sub>Mtb</sub> decreased IL-1β levels, while deletion of LprE<sub>Mtb</sub> was found to de-repress IL-1β level in caspase-1 dependent mechanism. Thus, our data indicate that LprE<sub>Mtb</sub> modulates IL-1β levels possibly in tandem with LL-37 downregulation to provide a favorable niche for bacterial survival. However, further mechanistic studies are required to establish the correlation between cathelicidin and IL-1β modulation by LprE.

Lipoproteins are known to trigger innate immune responses by binding to pattern recognition receptors, specifically TLR's [63,64,65]. LprA, LpqH, and LprG are the three mycobacterial lipoproteins known to interact with TLR-2. Our current study has provided sufficient evidences that LprE<sub>Mtb</sub> has a high binding affinity towards TLR-2 in comparison to TLR- 1, 4 and 6. To further confirm the involvement of TLR-2, we checked bacterial survival and the expression of *CAMP*, *Cyp27b1* and *VDR* in TLR 1, 2, 4 and 6 silenced macrophages. We observed a significant increase in the expression of *CAMP*, *Cyp27b1* and *VDR* that result in decreased survival of LprE expressing mycobacterial strains in TLR-2 silenced macrophages indicating that LprE<sub>Mtb</sub> mediated inhibition of cathelicidin expression is a TLR-2 dependent phenomenon.

Many pathogenic bacteria, including *Mtb*, inhibit autophagy mechanism to facilitate its persistence in host cells [66]. Several bacterial virulence proteins were found to inhibit the autophagy. LpqH<sub>Mtb</sub> activates autophagy, whereas EIS<sub>Mtb</sub> (enhance intracellular protein) protein suppresses autophagy [67]. Our previous work also showed that a *Mtb* phosphoribosyltransferase suppressed autophagy expression to promote intracellular bacterial survival [32]. In the current study, we found that LprE<sub>Mtb</sub> is also responsible for the suppression of autophagy as observed by the significant up-regulation of autophagic markers LC3, Atg-5, and Beclin-1 in cells infected with LprE<sub>Mtb</sub> deletion mutant. These results indicate that LprE<sub>Mtb</sub> suppress Vitamin D3 responsive cathelicidin, which may subsequently cause autophagic inhibition. Previous studies have shown that cathelicidin plays a role in the regulation of autophagy [68]. Altogether, inhibition of these antibacterial effector molecules by *Mtb* aids bacterial persistence inside macrophages.

One of the prominent mechanisms employed by *Mtb* to survive in macrophages is to block the phagosome maturation by inhibiting the recruitment of EEA1, Rab7, and LAMP-1, which are essential for the development of early and late endosomes and finally phago-

lysosome fusion. We have previously shown that exogenous administration of LL-37 increases the co-localization of *Msm* and *M. bovis*-BCG containing phagosomes with lysosomes [13]. Here, we found that infection with LprE<sub>Mtb</sub> expressing strain decreased the expression of EEA1, LAMP1, and Rab7 in THP-1 cells, while *Mtb*Δ*LprE* infection induced the expression of these proteins indicating that LprE<sub>Mtb</sub> supports bacterial survival by preventing phago-lysosome fusion. *L. monocytogenes* lipoproteins have also been shown to play an important role in the phagosomal escape of bacteria [69].

Stimulation of macrophages with cytokines restricts the growth of microorganisms within endocytic compartments [70]. It is shown that treatment of human macrophages with IL-12 restrict the growth of *M. bovis*-BCG by facilitating the phago-lysosome fusion [51]. Similarly, treatment with IL-22 was shown to increase the expression of endocytic marker proteins and increased bacterial killing by inducing phago-lysosomal fusion [52]. In our study, we observed decreased levels of IL-12 and IL-22 in cells infected with LprE<sub>Mtb</sub> expressing mycobacteria, while expression of these cytokines was found to be increased in *Mtb*Δ*LprE* infected cells. These results indicate that LprE<sub>Mtb</sub> mediates phagosomal arrest by down-regulating the expression of IL-12 and IL-22 cytokines. Moreover, lower levels of cathelicidin and IL-1β also explain the inhibition of phagosome maturation and fusion with lysosomes.

Collectively, our findings identified a new *Mtb* lipoprotein that could be used by pathogenic mycobacteria to alter host immune responses thus presenting attractive targets for new drug therapies. **Figure 8** shows a schematic representation of modulation of different host immune responses by LprE<sub>Mtb</sub> leading to increased bacillary survival in macrophages.

## MATERIALS AND METHODS

### Ethics and Biosafety Statement

All experiments were approved by the Institutional Biosafety committee of KIIT University (vide DBT memorandum No-BT/BS/17/493/2012-PID). All the bacterial mutants were handled in adherence to experimental guidelines and procedures approved by the Institutional Biosafety Committee (IBSC) of School of Biotechnology, KIIT University (KIIT/3-12).

### *In-silico* analysis

Bacterial gene sequences were obtained from Tuberculist (<http://tuberculist.epfl.ch/>) and Uniprot (<http://www.uniprot.org/>) databases. Protein secondary structure was predicted using SOPMA secondary structure based method ([https://npsa-prabi.ibcp.fr/cgi-bin/npsa\\_automat.pl?page=/NPSA/npsa\\_sopma.html](https://npsa-prabi.ibcp.fr/cgi-bin/npsa_automat.pl?page=/NPSA/npsa_sopma.html)). For tertiary structure prediction, LprE<sub>Mtb</sub> (Rv1252) sequence was BLAST against Protein Data Bank (PDB) to obtain a suitable template. Structure showing highest homology with human mitochondrial RNA polymerase (PDB ID: 3SPA) was chosen as a suitable template. Using this template, tertiary structure of LprE<sub>Mtb</sub> was depicted using Modeller9.12 [71]. The modelled LprE<sub>Mtb</sub> structure was energy minimized and validated using ModRefiner (<http://zhanglab.ccmb.med.umich.edu/ModRefiner/>) and RAMPAGE (<http://mordred.bioc.cam.ac.uk/~rapper/rampage.php>) web based servers. LprE<sub>Mtb</sub> domain analysis was done using Pfam (<http://pfam.xfam.org/>) database and visualized using PyMOL software v1.7.4 (<http://www.pymol.org>). Human toll like receptor-1,2, 4 and 6 structures were obtained from Protein Data bank (<http://www.rcsb.org/pdb/home/home.do>). Molecular docking of the structures was done using PatchDock server (<http://www.bioinfo3d.cs.tau.ac.il/PatchDock/>) and visualized using PyMOL. The Atomic surface energy was determined to analyze the protein-protein binding intensity.

## **Bacterial strains, cell lines, and reagents**

*M. tuberculosis* CDC1551 (NR-13649) and *M. tuberculosis* CDC1551 LprE mutant (NR-17996) were obtained from BEI Resources, USA. All *Mtb* strains were grown in Middlebrook 7H9 broth or on Middlebrook 7H10 plates (Difco, Sparks, Maryland, USA) as described previously [32-34]. *Escherichia coli* XL-10 Gold (Stratagene, San Diego, California, USA) was grown in Luria-Bertani (LB) broth supplemented with 20 µg/ml tetracycline. pSMT3 vector was a kind gift from Dr. Rakesh Sharma (IGIB, Delhi). THP-1 cells were maintained in RPMI Glutamax (Gibco, Waltham, MA, USA) medium supplemented with 10% fetal bovine serum (FBS) (Gibco) and penicillin-streptomycin solution (Gibco) at 37 °C and 5% CO<sub>2</sub>. Vitamin D3 and tetracycline were purchased from Sigma Aldrich (USA). TRIzol was purchased from Invitrogen (Carlsbad, California, USA). Complementary DNA (cDNA) synthesis kit was procured from Fermentas (USA). Trypsin-EDTA, SDS, Tris-HCl, and NaCl were obtained from Sigma-Aldrich (St. Louis, Missouri, USA). siRNA oligos were designed and manufactured by GeneX India Bioscience Pvt. Ltd (Chennai, India). All the cloning reagents and restriction enzymes were obtained from NEB (Ipswich, MA, USA).

## **Construction of *M. tuberculosis* CDC1551 LprE strain**

For the construction of complemented strain, *LprE* was amplified from *Mtb* CDC1551 genomic DNA using gene specific primers (**Table 1**) and was cloned into *NdeI-Hind III* sites of the pVV16 vector [72] and pNiT vector [72]. The pVV16-LprE and pNiT-LprE constructs were transformed into *Mtb*Δ*LprE* mutant to generate *Mtb*Δ*LprE*::*LprE* complemented strain.

### **Construction of recombinant *M.smegmatis* strain expressing *LprE<sub>Mtb</sub>* and *LpqH<sub>Mtb</sub>***

*LprE<sub>Mtb</sub>* and *LpqH<sub>Mtb</sub>* were PCR amplified using gene specific primers (**Table 1**) using genomic DNA as a template. The PCR amplified products were purified from the gel, double digested with *Pst*I and *Hind*III and cloned into pSMT3 shuttle vector separately. The recombinant constructs were transformed into competent *E. coli* XL-10 gold. LB agar plates supplemented with 20 µg/ml tetracycline and 50 µg/ml hygromycin was used to select the positive colonies and were further confirmed by colony PCR and sequencing using gene specific primers. Finally, the recombinant constructs were transformed into electro competent *Msm*. The positive colonies were selected on 7H10 medium containing 50 µg/ml hygromycin. The positive transformants were confirmed by colony PCR and sequencing using gene specific primers (**Table 1**). Generation of recombinant *Msm::LprE-LpqH* strain was confirmed by sequencing using gene specific primers.

### **Construction of *M. smegmatis*Δ5043 mutant**

The allelic exchange substrate (AES) for the generation of *Msm 5043* mutant (*Msm*Δ5043) was produced as described previously [72]. Briefly, approximately 800 kb regions upstream and downstream of *MSMEG\_5043* loci were PCR amplified using specific primers (**Table 1**). The amplicons were digested with *Dra*III-HF (NEB) and ligated with two compatible fragments (OriE+cosλ and Hyg<sup>res</sup>) from pYUB1474 [73] and pVV16 [72], respectively to generate allelic exchange substrate (AES). *MSMEG\_5043*-AES was linearized with *Sna*BI to elute upstream-Hyg-downstream flank. AES was electroporated into electro-competent *Msm* cells. Hygromycin-resistant colonies were screened by PCR to confirm deletion of *MSMEG\_5043* at its genomic locus (*Msm*Δ5043). Then *LprE-pSMT3* construct was electroporated into *Msm*Δ5043 mutant to create a complemented *Msm*Δ5043::*LprE* strain.

## Growth kinetics

*Msm::pSMT3* vector control, recombinant *Msm* expressing  $LprE_{Mtb}$  (*Msm::LprE*), *Msm* $\Delta$ 5043 and *Msm* $\Delta$ 5043::*LprE* strains were grown in 7H9 broth at 120 r.p.m at 37<sup>0</sup>C with. The growth kinetics was assayed by measuring the O.D at 600 nm (OD<sub>600</sub>) at regular intervals till death phase was observed. Similarly growth kinetics of *Mtb*, *Mtb* $\Delta$ *LprE* and *Mtb* $\Delta$ *LprE*::*LprE* was determined by measuring OD<sub>600</sub> at regular intervals till death phase was observed.

## Intracellular survival assay

*Mtb*, *Mtb* $\Delta$ *LprE*, and *Mtb* $\Delta$ *LprE*::*LprE*, *Msm::pSMT3*, *Msm::LprE*, *Msm* $\Delta$ 5043 and *Msm* $\Delta$ 5043::*LprE* strains were grown to mid-exponential phase. The bacterial cultures were pelleted at 5000 g for 5 min, washed twice with 1X phosphate buffer saline (PBS) and resuspended in RPMI medium to adjust the OD<sub>600</sub> to 0.1. THP-1 monocytes (2x10<sup>5</sup> cells/well) were differentiated into macrophages by addition of 20 nM phorbol 12-myristate 13-acetate (PMA) and incubated for 24 h. After which the cells are washed with RPMI medium to remove PMA, and then the cells are allowed to differentiate for 3 days at 37<sup>0</sup>C and 5% CO<sub>2</sub>. Cells were infected as described previously at a multiplicity of infection (MOI) 10 [74 ,32]. The intracellular bacterial survival was determined by lysing the cells with chilled 0.5% Triton-X 100 (Sigma) at different time points and plating the serially diluted samples on 7H10 medium. Bacterial colonies were enumerated after 3 and 21 days for *Msm* and *Mtb*, respectively.

## Flow cytometry analysis

THP-1 cells (2x10<sup>5</sup> cells/well) were seeded on a 24-well plate and treated with PMA as described above. Then cells were infected with *Msm::pSMT3*, *Msm::LprE*, *Msm* $\Delta$ 5043, and



*Msm*Δ5043::*LprE* at an MOI 10 as described above. After infection, cells were lysed by treating with 0.5% Triton X-100 for 2 min to release the intracellular bacteria. The cell suspension was centrifuged at 1000 g for 10 min to pellet down the lysed macrophage cells. Supernatants that contained released bacteria were again centrifuged at 12000 g for 10 min. The pellet was washed thrice with 1X PBS, bacterial cells were stained with 30 μM propidium iodide (PI) (Thermo Fisher, P3566) for 5 min in dark and the live cells were analyzed using BD FACSCantoII flow cytometer. Threshold (n=1000) was set on Side Scatter (SSC), and PMT voltages were set using an unstained sample of diluted bacteria grown to log phase. The bacterial population was positioned so that the entire population is on the scale on an FSC vs SSC plot. A total of 10,000 events are acquired and a gate was set according to the stained bacterial sample. Uninfected THP-1 cells stained with PI were also used to rule out cell contamination while analysis.

### **Phagocytosis assay**

THP-1 cells ( $2 \times 10^5$  cells/well) were infected with *Msm*::*pSMT3*, *Msm*::*LprE*, *Msm*Δ5043, and *Msm*Δ5043::*LprE* at an MOI 10. 1 and 2 h post infection cells were washed rigorously with 1X PBS to remove un-internalized and membrane adhering bacteria. The cells were lysed with 0.5% Triton X-100 and released intracellular bacteria were plated onto 7H10 plates to count live bacteria. Bacterial preparations were plated before infection to ensure that an equal number of bacteria were used for infection assays.

### **Isolation of human peripheral blood mononuclear cells (PBMCs)**

Blood was collected from healthy individuals, diluted (1:1 in PBS), layered onto an equal volume of Ficoll-Paque plus (GE Healthcare, 17-1440-02) and centrifuged at 100 g for 30 mins. The whitish buffy coat was washed twice with 1x PBS (100Xg, 10 mins). The cell

pellet was resuspended in RPMI medium supplemented with 10% FBS.  $1 \times 10^5$  cells were seeded onto 24-well for 24 h at 37 °C. Fresh RPMI media containing 5 ng/ml GM-CSF (R&D Systems, McKinley, MN, USA) was added per well and maintained at 37 °C for 72 hours. After differentiation, the cells were infected with mycobacterial strains as described above.

### **LL-37 treatment**

LL-37 peptide (LLGDFFRKSKEKIGKEFKRIVQRIKDFLRNLVPRTEs) was synthesized (GeneXbio, Delhi, India) at a purity of >95%. The peptides were dissolved in 0.01% acetic acid and stored at -20 °C until further use. THP-1 cells were treated with LL-37 (50µg/ml) 2 h before (pre-treated) and after (post-treated) infection as described previously [11].

### **TLR silencing**

siRNA duplex against TLR-1, 2,4 and 6 were designed and synthesized (GeneX, New Delhi, India) at 10 nmol concentration. 20 nM siRNAs were electroporated into  $10^6$  THP-1 cells. Scrambled siRNA was used as a negative control. The electroporated cells were treated with 20 nM PMA and seeded onto 6 well plates for infection assays. Silencing efficiency was determined using gene specific primers.

### **Western blotting**

All the antibodies except LC3 and CYP27B1 were purchased from Cell Signaling. The expression of phospho-p38 (Cat No-4511), total p38 (Cat No-9212),  $\beta$  actin (Cat No-4970), CYP27B1 (Thermo Scientific, Cat No-CA5 26065), VDR (Cat No-12550), Rab7 (Cat No-2094), EEA1 (Cat No-3288), LAMP1 (Cat No-9091), LC3 (Sigma, L7543), SQSTM1/p-62 (Cat No-5114), Atg-5 (Cat No-8540) and Beclin-1 (Cat No-3495) was determined in THP-

1 cells infected with *Mtb*, *Mtb* $\Delta$ *LprE*, *Mtb* $\Delta$ *LprE::LprE*, *Msm::pSMT3*, *Msm::LprE*, *Msm* $\Delta$ *5043* and *Msm* $\Delta$ *5043::LprE* strain as described above. Cells were harvested at the indicated time points by adding 80-100  $\mu$ l lysis buffer (1M Tris, 2M NaCl, 0.1M EDTA, 100 mM DTT, 1% Triton X100, Na<sub>3</sub>VO<sub>4</sub>·2H<sub>2</sub>O, 10% glycerol and PMSF) and stored in -80 °C overnight. The lysates were thawed on ice, briefly vortexed for 30 secs for three times and centrifuged at 13,000 g. for 30 mins. The isolated proteins were estimated by Bradford assay, run on SDS-PAGE, electrophoresed and transferred onto PVDF membrane (GE healthcare, Chicago, Illinois, USA) for 90 mins at 50 mA. Then the blots were blocked with either 5% BSA or 5% skimmed milk for 2 h at room temperature. The membranes were then incubated with primary antibodies (1:1000) overnight at 4 °C. The membranes were then washed thrice with 1X PBS containing 1% Tween 20 (PBST) for 5 min. The washed membrane was then incubated with goat anti-rabbit IgG HRP secondary antibody (GeneI merck, 6.2114E14)) for 2 h at room temperature. The membranes were then washed with 1X PBST for three times 5 min each and developed on X-ray film using chemiluminescent solvents. The band densities were quantified by computer scanning of the films and normalizing the values for analysis. Image J2 (NIH, USA) was used for computer analysis of pixel intensity of bands on films. Relative band densities relative to respective loading control were determined.

### **Quantitative real time PCR**

To check the expression of *LprE<sub>Mtb</sub>* as a function of growth, *Msm::pSMT3* and *Msm::LprE* strains were grown in 7H9 medium. Bacteria were harvested at different time points. Total RNA was isolated by using TRIzol reagent and cDNA was synthesized using Verso cDNA synthesis kit as per the manufacturer's instructions (Thermo Scientific). qRT-PCR amplification was carried out using gene specific primers and the synthesized cDNA as a template. All reactions were performed in a total reaction volume of 10  $\mu$ l using SYBR<sup>®</sup>

Green PCR mastermix (KAPA Biosystems), and carried out in Insta Q96 (Himedia, India) with initial denaturation at 95<sup>0</sup>C for 10 min, final denaturation at 95<sup>0</sup>C for 30 secs, annealing at 55<sup>0</sup>C for 30 sec and extension at 72<sup>0</sup>C for 30 sec to generate 200 bp amplicons. Similarly, the expression of *CAMP*, *Cyp27b1*, and *VDR*, *IL-12*, *IL-22* and *IL-1 $\beta$*  were measured by isolating RNA from infected THP-1 cells at mentioned time points post infection using gene specific primers (**Table 1**). The reaction conditions were as follows; initial denaturation at 95<sup>0</sup>C for 10 min, final denaturation at 95<sup>0</sup>C for 30 secs, annealing at 55<sup>0</sup>C for 30 secs, and extension at 72<sup>0</sup>C for 30 sec. The mRNA levels were normalized to the transcript levels of *sigA* and GAPDH and the relative fold changes were calculated. All quantitative PCR experiments were performed for three replicates and the data represented for each sample were relative to the expression level of housekeeping gene calculated using the 2<sup>- $\Delta\Delta$ CT</sup> method.

### **Statistical analysis**

Statistical analysis was performed with GraphPad Prism v 5.0 (GraphPad Software, La Jolla, California,USA, <http://www.graphpad.com>). Results are expressed as mean  $\pm$  SD, unless otherwise mentioned. Significance was referred as \*\*\* for P < 0.0001, \*\* for P < 0.001, \* for P < 0.05.

### **ACKNOWLEDGEMENTS**

The Senior Research Fellowship (80/902/14-ECDI) awarded to Avinash Padhi from Indian Council of Medical Research (ICMR), Govt. of India is highly acknowledged. We are thankful to all members of Avinash Sonawane, Vinay Nandicoori and Pawan Gupta laboratory for valuable discussions.

## FUNDING INFORMATION

This work was supported by Department of Biotechnology and Indian Council of Medical Research grants, Government of India to Dr. Avinash Sonawane.

## CONFLICT OF INTEREST

The authors declare no competing financial interest.

## REFERENCES

1. **Zumla A**, George A, Sharma V, Herbert RH, Oxley A, Oliver M. The WHO 2014 global tuberculosis report-further to go. *The Lancet Global Health*. 2015;3(1):e10-12. doi: 10.1016/S2214-109X(14)70361-4.
2. **Malik ZA**, Iyer SS, Kusner DJ. *Mycobacterium tuberculosis* phagosomes exhibit altered calmodulinx-dependent signal transduction: contribution to inhibition of phagosome-lysosome fusion and intracellular survival in human macrophages. *Journal of Immunology*. 2001;166: 3392-3401. doi: 10.4049/jimmunol.166.5.3392
3. **He C**, Klionsky DJ. Regulation mechanisms and signaling pathways of autophagy. *Annual Review of Genetics*. 2009;43:67-93. doi: 10.1146/annurev-genet-102808-114910. Review. PMID: 19653858;
4. **Cooper AM**, Mayer-Barber KD, Sher A. Role of innate cytokines in mycobacterial infection. *Mucosal Immunology*.2011;4: 252-260. doi: 10.1038/mi.2011.13
5. **Diacovich L**, Gorvel JP. Bacterial manipulation of innate immunity to promote infection. *Nature Reviews Microbiology*. 2010;8: 117-128. doi: 10.1038/nrmicro2295

6. **Harding CV**, Boom WH. Regulation of antigen presentation by Mycobacterium tuberculosis: a role for Toll-like receptors. *Nature Reviews Microbiology*.2010;8: 296-307. doi: 10.1038/nrmicro2321
7. **Padhi A**, Sengupta M, Sengupta S, RoehmKH, Sonawane A. Antimicrobial peptides and proteins in mycobacterial therapy: current status and future prospects. *Tuberculosis (Edinburg)*. 2014;94: 363-373. doi: 10.1016/j.tube.2014.03.011
8. **Sørensen O**, Arnljots K, Cowland JB, BaintonDF, Borregaard N. The human antibacterial cathelicidin, hC AP-18, is synthesized in myelocytes and metamyelocytes and localized to specific granules in neutrophils. *Blood*. 1997;90: 2796-2803. PMID: 9326247.
9. **Agerberth B**, Charo J, Werr J, Olsson B, Idali F, Lindbom L, et al. The human antimicrobial and chemotactic peptides LL-37 and alpha-defensins are expressed by specific lymphocyte and monocyte populations. *Blood*. 2000;96:3086-3093. PMID: 11049988.
10. **Sørensen OE**, Follin P, Johnsen AH, Calafat J, Tjabringa GS, Hiemstra PS, Borregaard N. Human cathelicidin, hCAP-18, is processed to the antimicrobial peptide LL-37 by extracellular cleavage with proteinase 3. *Blood*. 2001;97: 3951-3959. doi: 10.1182/blood.V97.12.3951.
11. **Brogden KA**. Antimicrobial peptides: pore formers or metabolic inhibitors in bacteria? *Nat Rev Microbiol*. 2005;3: 238-250. doi:10.1038/nrmicro1098
12. **Naik SK**, Padhi A, Ganguli G, Sengupta S, Pati S, Das D, Sonawane A. Mouse Bone Marrow Sca-1(+) CD44(+) Mesenchymal Stem Cells Kill Avirulent Mycobacteria but not Mycobacterium tuberculosis through Modulation of Cathelicidin Expression via the p38 Mitogen-Activated Protein Kinase-Dependent Pathway. *Infection and Immunity*. 2017 Sep 20;85(10). pii: e00471-17. doi: 10.1128/IAI.00471-17.

13. **Sonawane A**, Santos JC, Mishra BB, Jena P, Progida C, Sorensen OE, Gallo R, Appelberg R, Griffiths G. Cathelicidin is involved in the intracellular killing of mycobacteria in macrophages. *Cellular Microbiology*.2011; 13: 1601-1617.doi: 10.1111/j.1462-5822.2011.01644.x
14. **Torres-Juarez F**, Cardenas-Vargas A, Montoya-Rosales A, González-Curiel I, Garcia-Hernandez MH, Enciso-Moreno JA, Hancock RE, Rivas-Santiago B. LL-37 immunomodulatory activity during *Mycobacterium tuberculosis* infection in macrophages. *Infection and Immunity*. 2015;83: 4495-4503. doi: 10.1128/IAI.00936-15
15. **Hewison M**. Antibacterial effects of vitamin D. *Nature Reviews Endocrinology*. 2011; 7(8):436. doi: 10.1038/nrendo.2010.226. PMID: 21263449.
16. **Shin DM**, Yuk JM, Lee HM, Lee SH, Son JW, Harding CV, Kim JM, Modlin RL, Jo EK. Mycobacterial lipoprotein activates autophagy via TLR2/1/CD14 and a functional vitamin D receptor signalling. *Cellular Microbiology*. 2010;12:1648-1665. doi: 10.1111/j.1462-5822.2010.01497.x
17. **Gombart AF**, Borregaard N, Koeffler HP. Human cathelicidin antimicrobial peptide (CAMP) gene is a direct target of the vitamin D receptor and is strongly up-regulated in myeloid cells by 1,25-dihydroxyvitamin D<sub>3</sub>. *The FASEB Journal*. 2005;19: 1067-1077. doi:10.1096/fj.04-3284com
18. **Kovacs-Simon A**, Titball RW, Michell SL. Lipoproteins of bacterial pathogens. *Infection and Immunity*. 2011;79: 548-561. doi: 10.1128/IAI.00682-10
19. **Palaniappan R**, Singh S, Singh UP, Sakthivel SK, Ades EW, Briles DE, Hollingshead SK, Paton JC, Sampson JS, Lillard JW Jr. Differential PsaA-, PspA-, PspC-, and PdB-specific

immune responses in a mouse model of pneumococcal carriage. *Infection and Immunity*.2005;73: 1006-1013. doi: 10.1128/IAI.73.2.1006-1013.2005

20. **Novak R**, Braun JS, Charpentier E, Tuomanen E. Penicillin tolerance genes of *Streptococcus pneumoniae*: the ABC-type manganese permease complex Psa. *Molecular Microbiology*.1998;29: 1285–1296. doi: 10.1046/j.1365-2958.1998.01016.x

21. **Zhang JR**, Norris SJ. Genetic variation of the *Borrelia burgdorferi* gene *vls* E involves cassette-specific, segmental gene conversion. *Infection and Immunity*.1998;66: 3698–3704.

22. **Shuto T**, Xu H, Wang B, Han J, Kai H, Gu XX, Murphy TF, Lim DJ, Li JD. Activation of NF-kappa B by nontypeable Haemophilus influenzae is mediated by toll-like receptor 2-TAK1-dependent NIK-IKK alpha/beta-I kappa B alpha and MKK3/6-p38 MAP kinase signaling pathways in epithelial cells. *Proceedings of the National Academy of Science U S A*.2001;98: 8774-8779. doi: 10.1073/pnas.151236098.

23. **Snapper CM**, Rosas FR, Jin L, Wortham C, Kehry MR, Mond JJ. Bacterial lipoproteins may substitute for cytokines in the humoral immune response to T cell-independent type II antigens. *Journal of Immunology*. 1995;155: 5582-5589.

24. **Pennini ME**, Pai RK, Schultz DC, Boom WH, Harding CV. *Mycobacterium tuberculosis* 19-kDa lipoprotein inhibits IFN-gamma-induced chromatin remodeling of MHC2TA by TLR2 and MAPK signaling. *Journal of Immunology*. 2006;176: 4323-4330. doi: 10.4049/jimmunol.176.7.4323

25. **Sanchez A**, Espinosa P, Esparza MA, Colon M, Bernal G, Mancilla R. *Mycobacterium tuberculosis* 38-kDa lipoprotein is apoptogenic for human monocyte-derived macrophages. *Scandinavian Journal of Immunology*. 2009;69: 20-28. doi: 10.1111/j.1365-3083.2008.02193.x



26. **Sander P**, Rezwan M, Walker B, Rampini SK, Kroppenstedt RM, Ehlers S, Keller C, Keeble JR, Hagemeyer M, Colston MJ, Springer B, Böttger EC. Lipoprotein processing is required for virulence of *Mycobacterium tuberculosis*. *Molecular Microbiology*. 2004;52: 1543-1552. doi: 10.1111/j.1365-2958.2004.04041.x
27. **Liu PT**, Stenger S, Li H, Wenzel L, Tan BH, Krutzik SR, Ochoa MT, Schaubert J, Wu K, Meinken C, Kamen DL, Wagner M, Bals R, Steinmeyer A, Zügel U, Gallo RL, Eisenberg D, Hewison M, Hollis BW, Adams JS, Bloom BR, Modlin RL. Toll-like receptor triggering of a vitamin D-mediated human antimicrobial response. *Science*. 2006;311:1770-1773. doi: 10.1126/science.1123933.
28. **Larcombe L**, Orr P, Turner-Brannen E, Slivinski CR, Nickerson PW, Mookherjee N. Effect of Vitamin D Supplementation on *Mycobacterium tuberculosis*-Induced Innate Immune Responses in a Canadian Dené First Nations Cohort. *PLoS ONE*. 2012;7(7): e40692. doi: 10.1371/journal.pone.0040692. doi: 10.1371/journal.pone.0040692.
29. **Sassetti CM**, Rubin EJ. Genetic requirements for mycobacterial survival during infection. *Proceedings of the National Academy of Science U S A*. 2003;100: 12989-12994. doi: 10.1073/pnas.2134250100.
30. **Agrawal P**, Miryala S, Varshney U. Use of *Mycobacterium smegmatis* deficient in ADP-ribosyltransferase as surrogate for *Mycobacterium tuberculosis* in drug testing and mutation analysis. *PLoS One*. 2015;10(4): e0122076. doi: 10.1371/journal.pone.0122076.
31. **Tiwari BM**, Kannan N, Vemu L, Raghunand TR. The *Mycobacterium tuberculosis* PE proteins Rv0285 and Rv1386 modulate innate immunity and mediate bacillary survival in macrophages. *PLoS One*. 2012; 7(12): e51686. doi: 10.1371/journal.pone.0051686.

32. **Mohanty S**, Jagannathan L, Ganguli G, Padhi A, Roy D, Alaridah N, Saha P, Nongthomba U, Godaly G, Gopal RK, Banerjee S, Sonawane A. A mycobacterial phosphoribosyltransferase promotes bacillary survival by inhibiting oxidative stress and autophagy pathways in macrophages and zebrafish. *The Journal of Biological Chemistry*. 2015;290: 13321-13343. doi: 10.1074/jbc.M114.598482
33. **Mohanty S**, Dal Molin M, Ganguli G, Padhi A, Jena P, Selchow P, Sengupta S, Meuli M, Sander P, Sonawane A. *Mycobacterium tuberculosis* EsxO (Rv2346c) promotes bacillary survival by inducing oxidative stress mediated genomic instability in macrophages. *Tuberculosis*. 2016;96: 44-57. doi: 10.1016/j.tube.2015.11.006
34. **Padhi A**, Naik SK, Sengupta S, Ganguli G, Sonawane A. Expression of *Mycobacterium tuberculosis* NLPC/p60 family protein Rv0024 induce biofilms formation and resistance against cell wall acting anti-tuberculosis drugs in *Mycobacterium smegmatis*. *Microbes and Infection*. 2015;18: 224-236. doi: 10.1016/j.micinf.2015.11.007.
35. **Kapopoulou A**, Lew JM, Cole ST. The MycoBrowser portal: a comprehensive and manually annotated resource for mycobacterial genomes. *Tuberculosis (Edinburg)*. 2011; 91(1):8-13. doi: 10.1016/j.tube.2010.09.006.
36. **Ramos R**, Domingues L, Gama FM. LL37, a human antimicrobial peptide with immunomodulatory properties. In A. Mendez-Vilas, editor. Science against microbial pathogens: communicating current research and technological advances. 2011;2:915-925. *International Standard Book Number: 978-84-939843-1-1, 911-925.*
37. **Rekha RS**, Rao Muvva SS, Wan M, Raqib R, Bergman P, Brighenti S, Gudmundsson GH, Agerberth B. Phenylbutyrate induces LL-37-dependent autophagy and intracellular killing of *Mycobacterium tuberculosis* in human macrophages. *Autophagy*. 2015;11(9):1688-1699. doi: 10.1080/15548627.2015.1075110.

38. **Gombart AF**. The vitamin D-antimicrobial peptide pathway and its role in protection against infection. *Future Microbiology*. 2009;4(9):1151-1165. doi: 10.2217/fmb.09.87.
39. **Wang J**, Li BX, Ge PP, Li J, Wang Q, Gao GF, Qiu XB, Liu CH. *Mycobacterium tuberculosis* suppresses innate immunity by coopting the host ubiquitin system. *Nature Immunology*. 2015;16(3):237-245.doi: 10.1038/ni.3096.
40. **Eklund D**, Persson HL, Larsson M, Welin A, Idh J, Paues J,Fransson SG,Stendahl O, Schön T, Lerm M. Vitamin D enhances IL-1 $\beta$  secretion and restricts growth of *Mycobacterium tuberculosis* in macrophages from TB patients. *International Journal of Mycobacteriology*. 2013;2:18-25. doi: 10.1016/j.ijmyco.2012.11.001
41. **Drage MG**, Pecora ND, Hise AG, Febbraio M, Silverstein RL, Golenbock DT, Boom WH, Harding CV. TLR2 and its co-receptors determine responses of macrophages and dendritic cells to lipoproteins of *Mycobacterium tuberculosis*. *Cellular Immunology*.2009;258: 29-37. doi: 10.1016/j.cellimm.2009.03.008.
42. **George PD**, Nagasundaram C, Chakraborty N, Chen CL, Zhu H Extrapolating the effect of deleterious nsSNPs in the binding adaptability of flavopiridol with CDK7 protein: a molecular dynamics approach. *Human Genomics*, 2013;7(1),10. doi: 10.1186/1479-7364-7-10
43. **Kolls JK**, McCray PB Jr, Chan YR. Cytokine-mediated regulation of antimicrobial proteins. *Nature Reviews. Immunology*. 2008;8(11):829-835. doi: 10.1038/nri2433
44. **Eklund D**, Persson HL, Larsson M, WelinA, Idh J, Paues J, Fransson SG, Stendahl O, Schön T, Lerm M. Vitamin D enhances IL-1 $\beta$  secretion and restricts growth of *Mycobacterium tuberculosis* in macrophages from TB patients. *International Journal of Mycobacteriology*. 2013; 2(1):18-25. doi: 10.1016/j.ijmyco.2012.11.001

45. **Netea MG**, Simon A, van de Veerdonk F, Kullberg BJ, Van der Meer JW, Joosten LA. IL-1beta processing in host defense: beyond the inflammasomes. *PLoS Pathogens*. 2010; 6(2):e1000661. doi: 10.1371/journal.ppat.1000661
46. **Gutierrez MG**, Master SS, Singh SB, Taylor GA, Colombo MI, Deretic V. Autophagy is a defense mechanism inhibiting BCG and Mycobacterium tuberculosis survival in infected macrophages. *Cell*. 2004;119(6):753-766. doi: [10.1016/j.cell.2004.11.038](https://doi.org/10.1016/j.cell.2004.11.038)
47. **Mizushima N**, Yoshimori T, Levine B. Methods in Mammalian Autophagy Research. *Cell*. 2010; 140(3), 313–326. doi: 10.1016/j.cell.2010.01.028
48. **Glick D**, Barth S, Macleod KF. Autophagy: cellular and molecular mechanisms. *The Journal of Pathology*. 2010;221(1), 3–12. doi: 10.1002/path.2697
49. **Zuo LL**, Wu YM, You XX. Mycoplasma lipoproteins and Toll-like receptors. *Journal of Zhejiang University Science B*. 2009;10: 67-76. doi: 10.1631/jzus.B0820256
50. **Fekonja O**, Avbelj M, Jerala R. Suppression of TLR signaling by targeting TIR domain-containing proteins. *Current Protein and Peptide Science*. 2012;13(8): 776-788. doi: 10.2174/138920312804871148
51. **Jung JY**, Robinson CM. IL-12 and IL-27 regulate the phagolysosomal pathway in mycobacteria-infected human macrophages. *Cell Communication and Signaling*. 2014;12:16. doi: 10.1186/1478-811X-12-16
52. **Dhiman R**, Venkatasubramanian S, Paidipally P, Barnes PF, Tvinnereim A, Vankayalapati R. Interleukin 22 Inhibits Intracellular Growth of *Mycobacterium tuberculosis* by Enhancing Calgranulin A Expression. *Journal of Infectious Diseases*. 2014;209: 578-587. doi: 10.1093/infdis/jit495.

53. **Sutcliffe IC**, Harrington DJ. Lipoproteins of *Mycobacterium tuberculosis*: an abundant and functionally diverse class of cell envelope components. *FEMS Microbiology Reviews*. 2004;28(5):645-659. doi : 10.1016/j.femsre.2004.06.002
54. **Méndez-Samperio P**, Miranda E, Trejo A. Expression and secretion of cathelicidin LL-37 in human epithelial cells after infection by *Mycobacterium bovis* Bacillus Calmette-Guérin. *Clinical and Vaccine Immunology*. 2008;15: 1450-1455. doi: 10.1128/CVI.00178-08
55. **Anes E**, Peyron P, Staali L, Jordao L, Gutierrez MG, Kress H, Hagedorn M, Maridonneau-Parini I, Skinner MA, Wildeman AG, Kalamidas SA, Kuehnel M, Griffiths G. Dynamic life and death interactions between *Mycobacterium smegmatis* and J774 macrophages. *Cellular Microbiology*. 2006;8: 939-960. doi:10.1111/j.1462-5822.2005.00675.x
56. **Bergman P**, Johansson L, Asp V, Plant L, Gudmundsson GH, Jonsson AB, Agerberth B. *Neisseria gonorrhoeae* downregulates expression of the human antimicrobial peptide LL-37. *Cellular Microbiology*. 2005;7: 1009-1017. doi: 10.1111/j.1462-5822.2005.00530.x
57. **Chakraborty K**, Ghosh S, Koley H, Mukhopadhyay AK, Ramamurthy T, Saha DR, Mukhopadhyay D, Roychowdhury S, Hamabata T, Takeda Y, Das S. Bacterial exotoxins downregulate cathelicidin (hCAP-18/LL-37) and human beta-defensin 1 (HBD-1) expression in the intestinal epithelial cells. *Cellular Microbiology*. 2008;10: 2520-2537. doi: 10.1111/j.1462-5822.2008.01227.x
58. **Islam D**, Bandholtz L, Nilsson J, Wigzell H, Christensson B, Agerberth B, Gudmundsson G. Downregulation of bactericidal peptides in enteric infections: a novel immune escape mechanism with bacterial DNA as a potential regulator. *Nature Medicine*. 2001;7: 180-185. doi:10.1038/84627.

59. **Marshall TG**. Vitamin D discovery outpaces FDA decision making. *Bioessays*.2008;30: 173-182. DOI: 10.1002/bies.20708
60. **Shoenfeld Y**, Isenberg DA. The mosaic of autoimmunity. *Immunology Today*. 1989;10: 123-126. doi:10.1016/0167-5699(89)90245-4.
61. **Elssner A**, Duncan M, Gavrilin M, Wewers MD. A novel P2X7 receptor activator, the human cathelicidin-derived peptide LL37, induces IL-1 beta processing and release. *Journal of Immunology*. 2004;172: 4987-4994. doi: 10.4049/jimmunol.172.8.4987.
62. **Yu J**, Mookherjee N, Wee K, Bowdish DM, Pistolic J, Li Y, Rehaume L, Hancock RE. Host defense peptide LL-37, in synergy with inflammatory mediator IL-1beta, augments immune responses by multiple pathways. *Journal of Immunology*. 2007;179(11):7684-7691. doi: doi.org/10.4049/jimmunol.179.11.7684
63. **Medzhitov R**, Janeway Jr. CA. Innate immunity: the virtues of a nonclonal system of recognition. *Cell*. 1997;91: 295-298. doi: doi.org/10.1016/S0092-8674(00)80412-2
64. **Yang RB**, Mark MR, Gray A, Huang A, Xie MH, Zhang M, Goddard A, Wood WI, Gurney AL, Godowski PJ. Toll-like receptor-2 mediates lipopolysaccharide-induced cellular signalling. *Nature*. 1998;395: 284-288. doi:10.1038/26239
65. **Zimmerli S**, Edwards S, Ernst JD. Selective receptor blockade during phagocytosis does not alter the survival and growth of Mycobacterium tuberculosis in human macrophages. *American Journal of Respiratory Cell and Molecular Biology*. 1996; 15(6):760-770 doi: 10.1165/ajrcmb.15.6.8969271
66. **Gong L**, Devenish RJ, Prescott M. Autophagy as a macrophage response to bacterial infection. *IUBMB Life*. 2012;64(9):740-747. doi: 10.1002/iub.1070

67. **Shin DM**, Jeon BY, Lee HM, Jin HS, Yuk JM, Song CH, Lee SH, Lee ZW, Cho SN, Kim JM, Friedman RL, Jo EK. Mycobacterium tuberculosis eis regulates autophagy, inflammation, and cell death through redox-dependent signaling. *PLoS Pathogens*. 2010;6(12):e1001230. doi: 10.1371/journal.ppat.1001230
68. **Yuk JM**, Shin DM, Lee HM, Yang CS, Jin HS, Kim KK, Lee ZW, Lee SH, Kim JM, Jo EK. Vitamin D3 induces autophagy in human monocytes/macrophages via cathelicidin. *Cell Host & Microbe*. 2009;6(3):231-243. doi: 10.1016/j.chom.2009.08.004
69. **Réglier-Poupet H**, Frehel C, Dubail I, Beretti JL, Berche P, Charbit A, Raynaud C. Maturation of lipoproteins by type II signal peptidase is required for phagosomal escape of *Listeria monocytogenes*. *Journal of Biological Chemistry*. 2003;278:49469-49477. doi:10.1074/jbc.M307953200
70. **Via LE**, Fratti RA, McFalone M, Pagan-Ramos E, Deretic D, Deretic V. Effects of cytokines on mycobacterial phagosome maturation. *Journal of Cell Science*. 1998;111: 897-905. PMID: 9490634.
71. **Kushwaha SK**, Shakya M. Protein interaction network analysis--approach for potential drug target identification in Mycobacterium tuberculosis. *Journal of Theoretical Biology*. 2010;262(2):284-294. doi: 10.1016/j.jtbi.2009.09.029.
72. **Khan MZ**, Bhaskar A, Upadhyay S, Kumari P, Rajmani RS, Jain P, Singh A, Kumar D, Bhavesh NS, Nandicoori VK. Protein kinase G confers survival advantage to Mycobacterium tuberculosis during latency-like conditions. *Journal of Biological Chemistry*. 2017;292(39):16093-16108. doi: 10.1074/jbc.M117.797563.
73. **Bardarov S**, Bardarov Jr S, Pavelka Jr MS, Sambandamurthy V, Larsen M, Tufariello J, Chan J, Hatfull G, Jacobs Jr WR. Specialized transduction: an efficient method for generating

marked and unmarked targeted gene disruptions in *Mycobacterium tuberculosis*, *M. bovis* BCG and *M. smegmatis*. *Microbiology*. 2002;148(10):3007-3017. doi: 10.1099/00221287-148-10-3007.

74. **Bhagyaraj E**, Nanduri R, Saini A, Dkhar HK, Ahuja N, Chandra V, Mahajan S, Kalra R, Tiwari D, Sharma C, Janmeja AK, Gupta P. Human Xenobiotic Nuclear Receptor PXR Augments *Mycobacterium tuberculosis* Survival. *Journal of Immunology*. 2016;197(1):244-255. doi: 10.4049/jimmunol.1600203.



| Sl. No                                                   | Name of Primer                                     | Sequence (5'-3')                                      |
|----------------------------------------------------------|----------------------------------------------------|-------------------------------------------------------|
| <b>A. <i>Msm</i> Knock Out Primers</b>                   |                                                    |                                                       |
| 1                                                        | FP LHS <i>Msm</i> Δ5043<br>KO DraIII-SnaBI<br>site | CACCTTTTCACAAAGTGTACGTACAGGTCCAGCGTGCCGC<br>GTT       |
| 2                                                        | RP LHS <i>Msm</i> Δ5043<br>DraIII site             | TTTTTTTTT CACTTCGTG CTCGGCAGTTCGGACACCGC              |
| 3                                                        | FP RHS <i>Msm</i> Δ5043<br>DraIII site             | CACCTTTT CACAGAGTG ACACCAACGCCGAGAACCCC               |
| 4                                                        | FP RHS <i>Msm</i> Δ5043<br>DraIII -SnaBI site      | TTTTTTTTT CACCTTGTG TACGTA<br>CGGCGCCGTCGCCGAGCACC    |
| 5                                                        | FP <i>Msm</i> _5043                                | CACC CATATG GTGAAAAAGGTCGCCGGA                        |
| 6                                                        | RP <i>Msm</i> _5043                                | TTTT AAGCTT TCAACCGACGTTGCCCAT                        |
| 7                                                        | Hyg Forward                                        | CGATCCGGAGGAACTGGCGCA                                 |
| 8                                                        | Hyg Reverse                                        | CGTTCTCGGTGGTGTGCTGCGGTCCG                            |
| <b>B. <i>Mtb</i> <i>LprE</i> Complementation Primers</b> |                                                    |                                                       |
| 9                                                        | FP <i>Mtb</i> <i>LrpE</i>                          | CACC CATATG GTGCCCGGTGTGTGGTCA                        |
| 10                                                       | RP <i>Mtb</i> <i>LrpE</i>                          | TTTT AAGCTT TTAACCGCCGGTGGTGT                         |
| <b>C. Cloning Primers</b>                                |                                                    |                                                       |
| 11                                                       | Rv1252 FP#1                                        | GTCCCTGCAGGGTGCCCGGTGTGTGGTCACCACCCTGC                |
| 12                                                       | Rv1252 FP#2                                        | GTCCAAGCTTTTAACCGCCGGTGGTGTGCCGATCAGCTCG              |
| 13                                                       | LpqH FP                                            | ATATCTGCAGGGTGAAGCGTGGACTGACGGTCCG                    |
| 14                                                       | LpqH RP                                            | ATATAAGCTTTTAGGAACAGGTCACCTCGATTTTCTGAACGA<br>CTTGTTT |
| <b>D. qRT PCR Primers</b>                                |                                                    |                                                       |
| 15                                                       | <i>Rv1252</i> FP#3                                 | ACAATCGCCAAAGTCGTCTC                                  |
| 16                                                       | <i>Rv1252</i> FP#4                                 | CGGTATGTACTTGCCGAGGT                                  |
| 17                                                       | <i>CAMP</i> FP                                     | GATGGCATCAACCAGCGGTC                                  |
| 18                                                       | <i>CAMP</i> RP                                     | TTCACCAGCCCGTCCTTCTT                                  |
| 19                                                       | <i>CYP27b1</i> FP                                  | GTCCAGACAGCACTCCACTC                                  |
| 20                                                       | <i>CYP27b1</i> RP                                  | GTGACCAGCGTATTTTTGGGG                                 |

|                                  |                 |                            |
|----------------------------------|-----------------|----------------------------|
| 21                               | <i>VDR</i> FP   | TCGGCGCTTAGGAGAAATGC       |
| 22                               | <i>VDR</i> RP   | ACCCAAAGGCTTCCTCCACT       |
| 23                               | <i>GAPDH</i> FP | AGGGCCCTGACAACTCTTTT       |
| 24                               | <i>GAPDH</i> RP | AGGGGTCTACATGGCAACTG       |
| <b>E. TLRs Silencing Primers</b> |                 |                            |
| 25                               | TLR1 FP         | CAAGCAGGTTGTCTTGTGTTAAA    |
| 26                               | TLR1 RP         | CCTTTTGTAGGGGTGCCCAA       |
| 27                               | TLR2 FP         | AGCCAAGCTTTAGCCAATCA       |
| 28                               | TLR2 RP         | GGCAGCACTCAGATTCACAA       |
| 29                               | TLR4 FP         | GGTCAGACGGTGATAGCGAG       |
| 30                               | TLR4 RP         | TTTAGGGCCAAGTCTCCACG       |
| 31                               | TLR6 FP         | CAAACGTGGGCTCTTTTGGG       |
| 32                               | TLR6 RP         | AGGCACCTCCAGACAGTTAC       |
| <b>F. Cytokine Primers</b>       |                 |                            |
| 33                               | IL-1 $\beta$ FP | GGC TGC TGA CTT TGA AGG AC |
| 34                               | IL-1 $\beta$ RP | CAT GGG AAG AAA CTG GGA GA |
| 35                               | IL-22 FP        | CTCCTTCTCTTGGCCCTCTT       |
| 36                               | IL-22 RP        | GTTCAGCACCTGCTTCATCA       |
| 37                               | IL-12 FP        | GGATTGTTAGCGAGCTCAGG       |
| 38                               | IL-12 RP        | AAAACAGCTGCAGGAGGAAA       |

**Table 1: - List of primers used in this study.** FP: Forward primer, RP: Reverse primer, LHS: Left hand site, RHS: Right hand site.

## FIGURES AND FIGURE LEGENDS

**Fig 1**

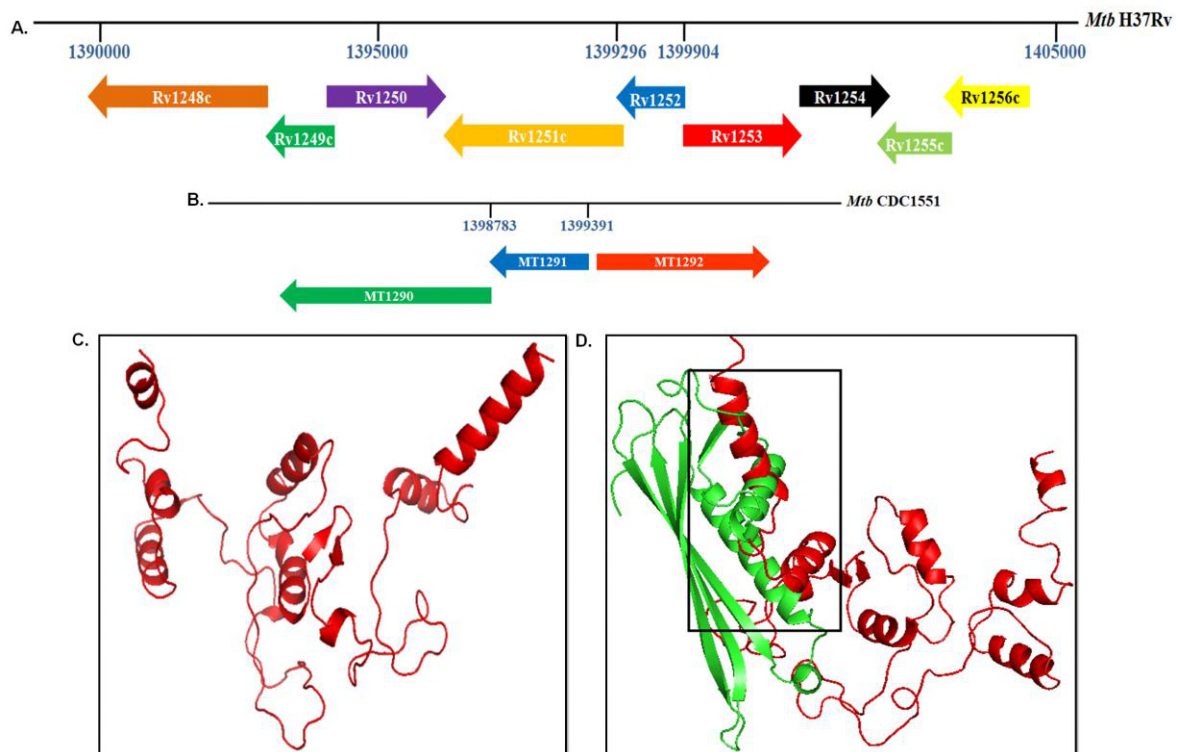

**Fig 1: *In silico* analysis of *LprE<sub>Mtb</sub>*.** **A.** Genetic organization of *Rv1252c* in *Mtb* H37Rv genome. **B.** Genetic organization of *MT1291* in *Mtb* CDC1551 genome. **C.** Prediction of *LprE<sub>Mtb</sub>* tertiary structure with modeler v9.1.2 using Human Mitochondrial RNA Polymerase (PDB ID: 3SPA) as a template. **D.** Domain alignment of energy minimized structure of *LprE<sub>Mtb</sub>* and *E. coli* outer membrane lipopolysaccharide transport lipoprotein LptE (PDB ID: 4NHR).

**Fig 2**

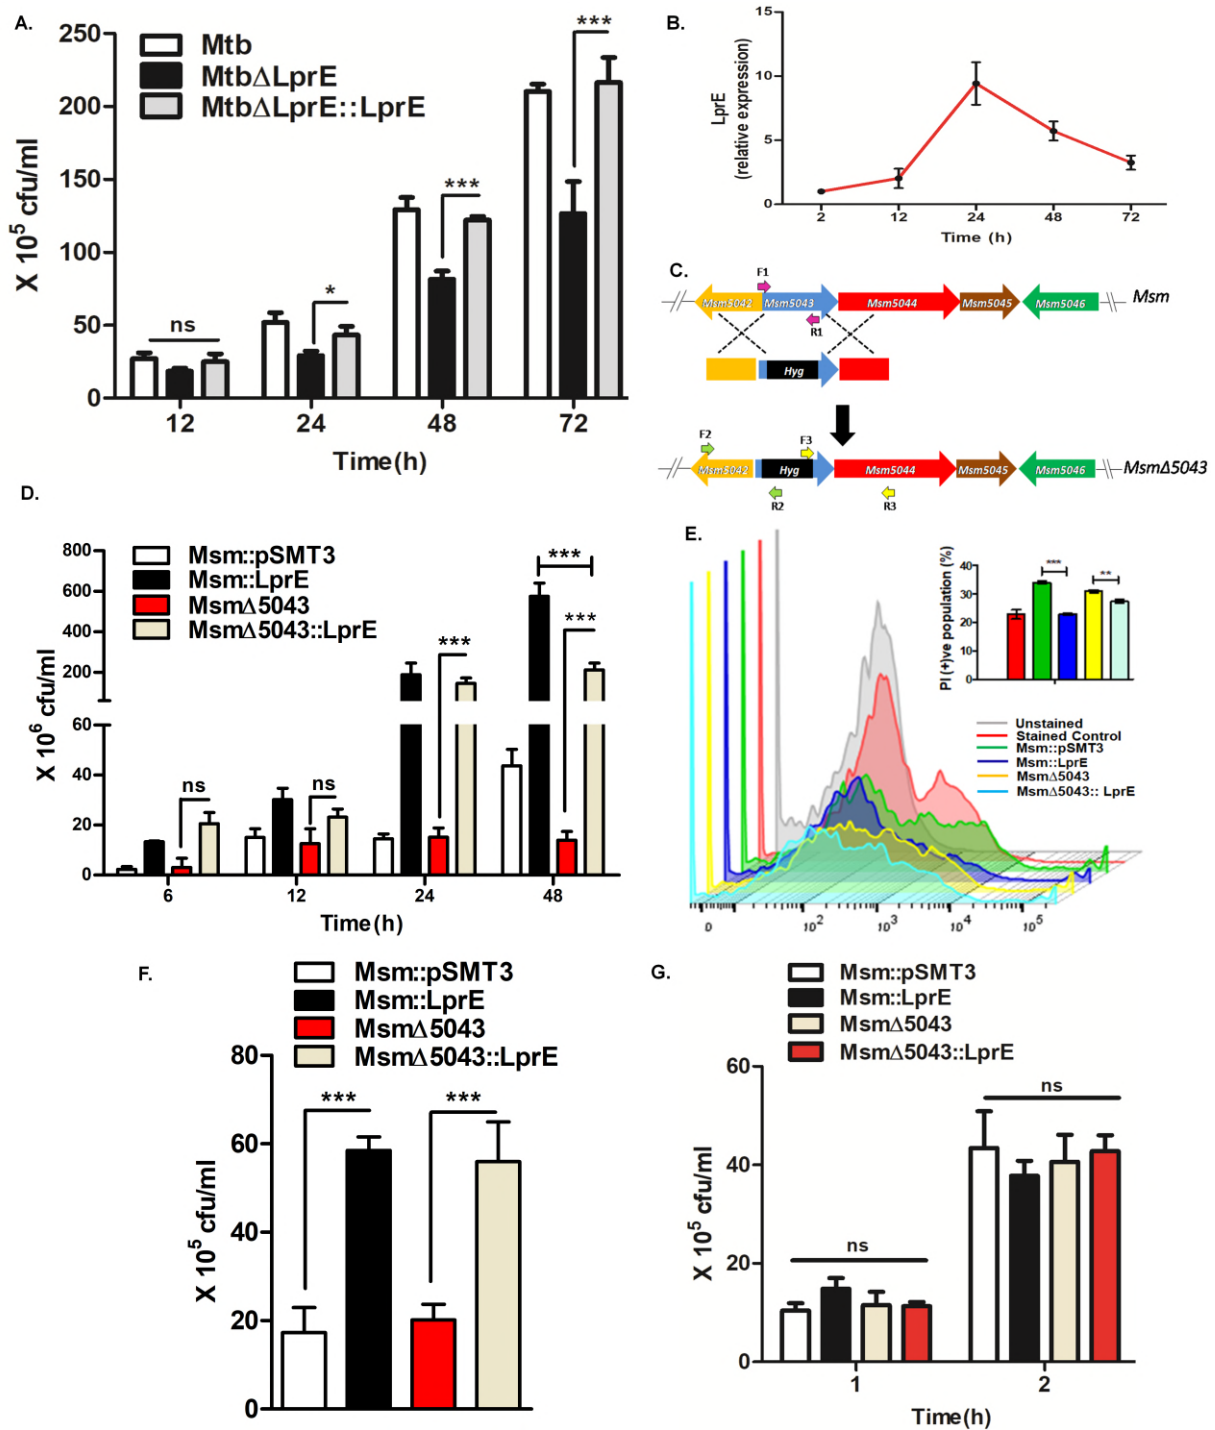

**Fig 2: Role of  $LprE_{Mtb}$  in intracellular survival in human macrophages.** **A.** THP-1 cells were infected with *Mtb*, *Mtb*Δ*LprE* and *Mtb*Δ*LprE*::*LprE* complemented strain. The cells were lysed and the intracellular survival was determined at 12, 24, 48 and 72 h post infection by cfu assay. **B.** qRT-PCR analysis of *LprE<sub>Mtb</sub>* expression was performed from intracellular

bacteria isolated from macrophages after 2, 12, 24, 48 and 72 h post infection. The expression values were normalized with *Msm sigA* gene. **C.** Schematic representation of construction of *Msm* $\Delta$ 5043 mutant (*MSM\_5043* in *Msm*). The primers used for screening knockout are represented by arrows. **D.** THP-1 cells were infected with *Msm::pSMT3*, *Msm::LprE*, *Msm* $\Delta$ 5043 and *Msm* $\Delta$ 5043::*LprE* strains. The cells were lysed and the intracellular survival was determined at 6, 12, 24, and 48 h post infection by cfu assay. **E.** THP-1 cells were infected with recombinant *Msm* strains for 2 h and intracellular survival was determined at 24 h post infection. Intracellular bacteria were stained with propidium iodide (PI) and analyzed by Flow cytometer. PI positive population was considered as dead bacteria, while negative as live. **F.** Human PBMCs were isolated from healthy individuals, differentiated into macrophages with GM-CSF and infected with *Msm::pSMT3*, *Msm::LprE*, *Msm* $\Delta$ 5043 and *Msm* $\Delta$ 5043::*LprE* strains for 2 h. The intracellular count was determined 24 h post infection by cfu assay. **G.** Phagocytosis rates of the above mentioned *Msm* strains was determined by determining intracellular counts in THP-1 cells at early time points of 1 and 2 h post infection. Experiments were performed in triplicates; Mean  $\pm$  SD; \*\*\* for  $P < 0.0001$ , \*\* for  $P < 0.001$ , \* for  $P < 0.05$ ; ns, non-significant.

**Fig 3**

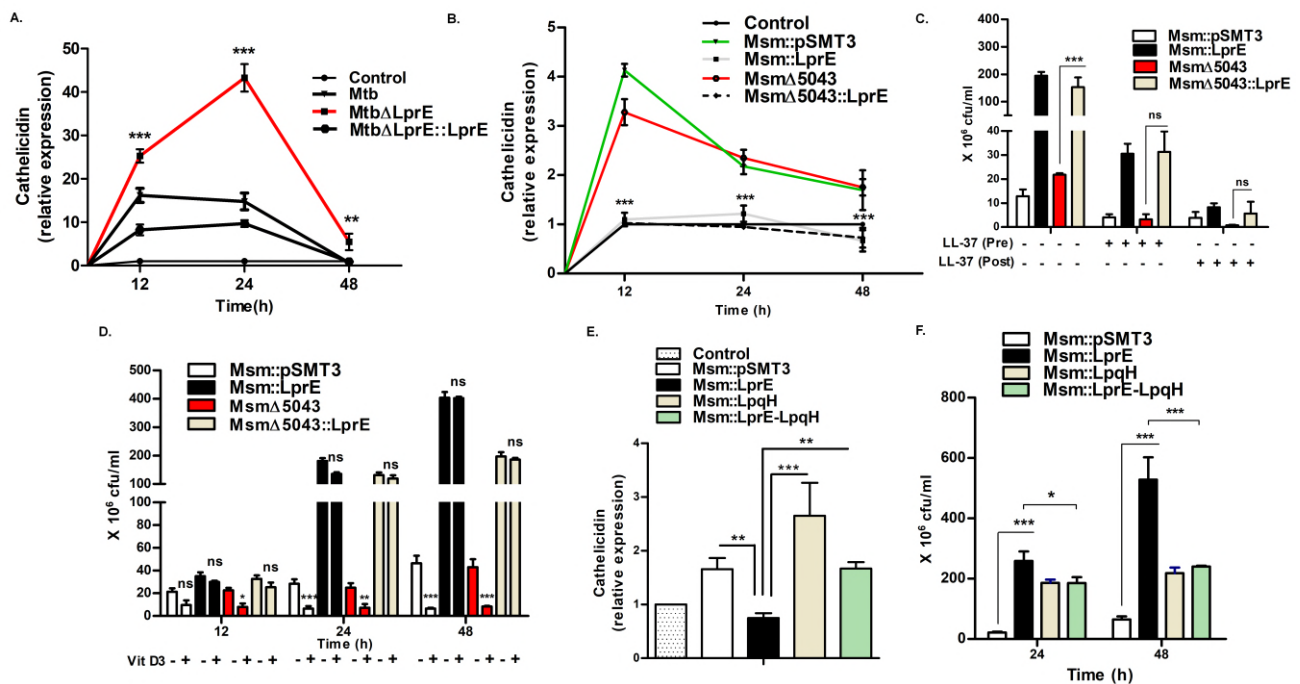

**Fig 3:  $LprE_{Mtb}$  inhibits the expression of cathelicidin.** **A.** THP-1 cells were infected with *Mtb*, *MtbΔLprE* and *MtbΔLprE::LprE* strains. The cells were harvested at 12, 24 and 48 h post infection, RNA was isolated and converted to cDNA. Cathelicidin (*CAMP*) expression was determined by qRT-PCR. **B.** Cathelicidin expression was determined by qRT-PCR in THP-1 cells infected with *Msm::pSMT3*, *Msm::LprE*, *MsmΔ5043* and *MsmΔ5043::LprE* at indicated time points. **C.** Cells were treated with 50  $\mu\text{g/ml}$  LL-37 2 h before (Pre) and 2 h post (Post) infection. Intracellular counts of *Msm::pSMT3*, *Msm::LprE*, *MsmΔ5043* and *MsmΔ5043::LprE* were determined 24 h post infection in untreated, pre and post treated cells by cfu assay. **D.** Survival of *Msm::pSMT3*, *Msm::LprE*, *MsmΔ5043* and *MsmΔ5043::LprE* in 1,25 D3-treated and untreated THP-1 cells 24 h post infection. Cells were treated with  $10^{-7}$  M 1,25 D3 18 h before infection. **E and F.** THP-1 cells were infected with *Msm::pSMT3*, *Msm::LprE*, *Msm::LpqH* and *Msm* co expressing *LprE<sub>Mtb</sub>* and *LpqH<sub>Mtb</sub>* (*Msm::LprE-LpqH*).

24 h post infection cells were harvested, **(E)** *CAMP* expression was checked by qRT-PCR and **(F)** intracellular survival was determined by cfu assay. Experiments were performed in triplicates; Mean  $\pm$  SD; \*\*\* for  $P < 0.0001$ , \*\* for  $P < 0.001$ , \* for  $P < 0.05$ ; ns, non-significant.



**Fig 3**

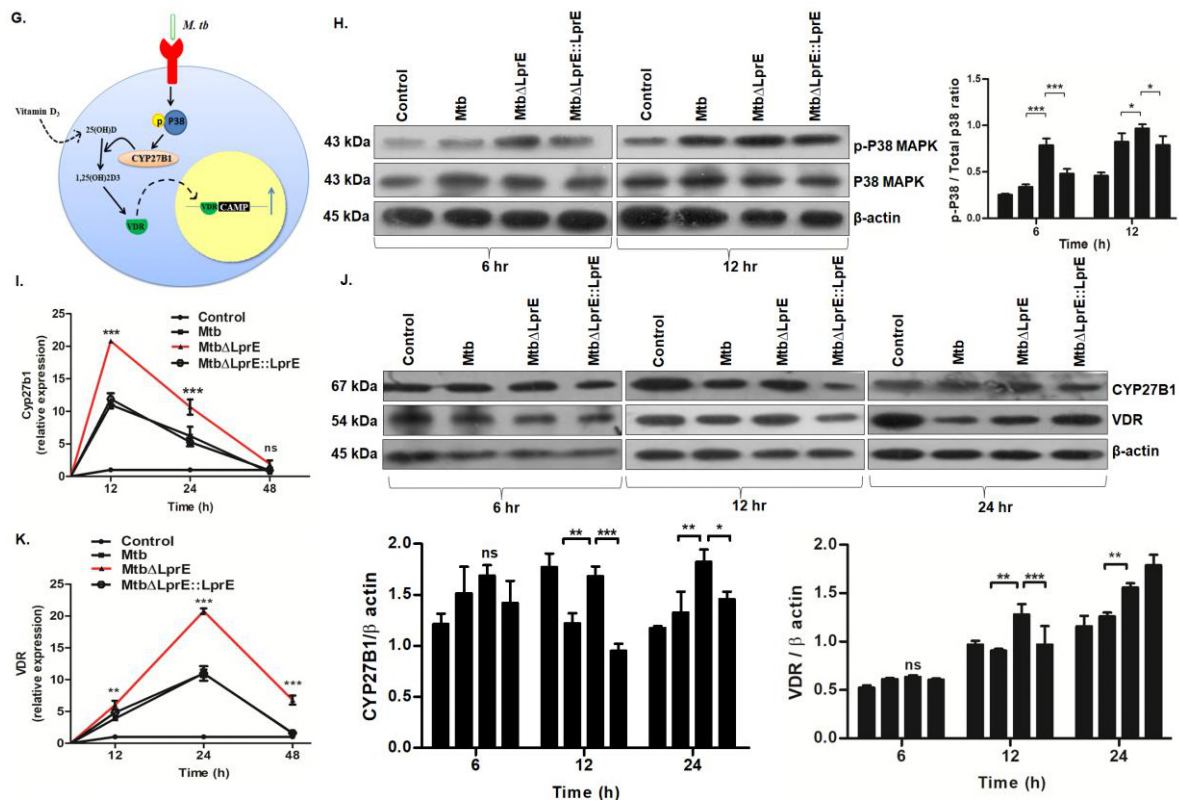

**Fig 3: *Mtb*Δ*LprE* infection derepresses the expression of cathelicidin via p38 MAPK pathway in macrophages.** **G.** Mycobacterial antigens activate p38 MAPK dependent Cyp27B1 and Vitamin D3 which then binds to VDR to activate the transcription of *CAMP* gene. THP-1 cells infected with *Mtb*, *Mtb*Δ*LprE* and *Mtb*Δ*LprE*::*LprE* strains were harvested at indicated time points to isolate total RNA and proteins. **H.** Western blot analysis of p38 MAPK expression was performed using anti-phospho-p38 antibody. The expression was normalized to total p38 MAPK and β actin as loading control. Expression of Cyp27B1 at transcriptional (**I**) and translational (**J**) levels 12, 24 and 48 h post infection was determined by qRT-PCR and Western blotting, respectively. Transcriptional (**K**) and translational (**J**) levels of Vitamin D Receptor (VDR) was determined in infected THP-1 cells. Quantitative densitometry of phosphor-p38 expression was done using Image J software under baseline conditions. The expression values were normalized with *GAPDH* in case of qRT-PCR and β



actin in western blotting. Experiments were performed in triplicates; Mean  $\pm$  SD; \*\*\* for  $P < 0.0001$ , \*\* for  $P < 0.001$ , \* for  $P < 0.05$ ; ns, non-significant.

**Fig 4**

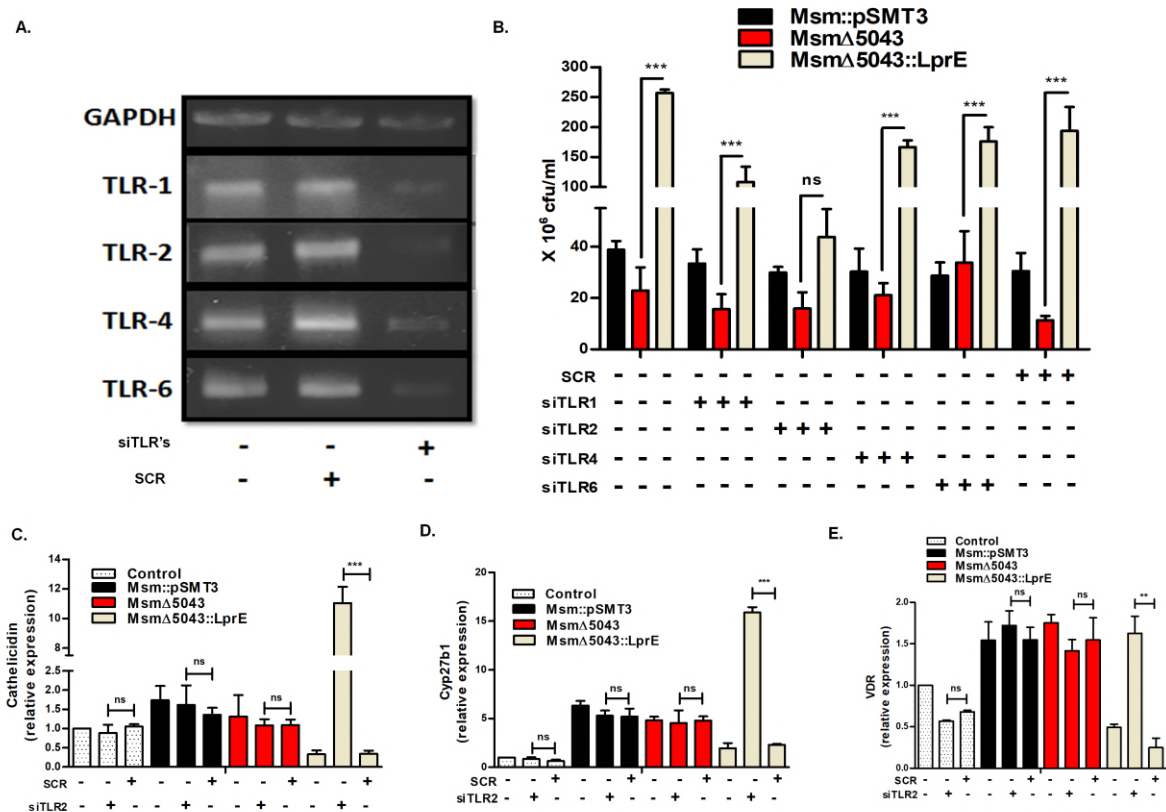

**Fig 4: Expression of *CAMP*, *Cyp27b1*, and *VDR*, is regulated via TLR-2.** **A.** Gene silencing was performed to knock down TLR-1,2,4 and 6. THP-1 cells were subjected to siRNA treatment by electroporation. Gene silencing was confirmed by RT-PCR (mRNA) and compared with cell treated with scrambled siRNA using gene specific primers. **B.** Untreated, TLR specific siRNA and scrambled siRNA treated THP-1 cells were infected with *Msm::pSMT3*, *Msm::LprE*, *MsmΔ5043* and *MsmΔ5043::LprE* strains. Cells were harvested at 24 h post infection and intracellular survival was determined by cfu assay. Untreated, siTLR-2 and scrambled treated THP-1 cells were infected with above mentioned strains. Cells were harvested at 24 h post infection, total RNA isolated, converted to cDNA and qRT-PCR was performed to determine the expression of **C.** Cathelicidin (*CAMP*), **D.** *Cyp27b1* and **E.** *VDR*. Experiments were performed in triplicates; Mean  $\pm$  SD; \*\*\* for  $P < 0.0001$ , \*\* for  $P < 0.001$ ; ns, non-significant.

**Fig 5**

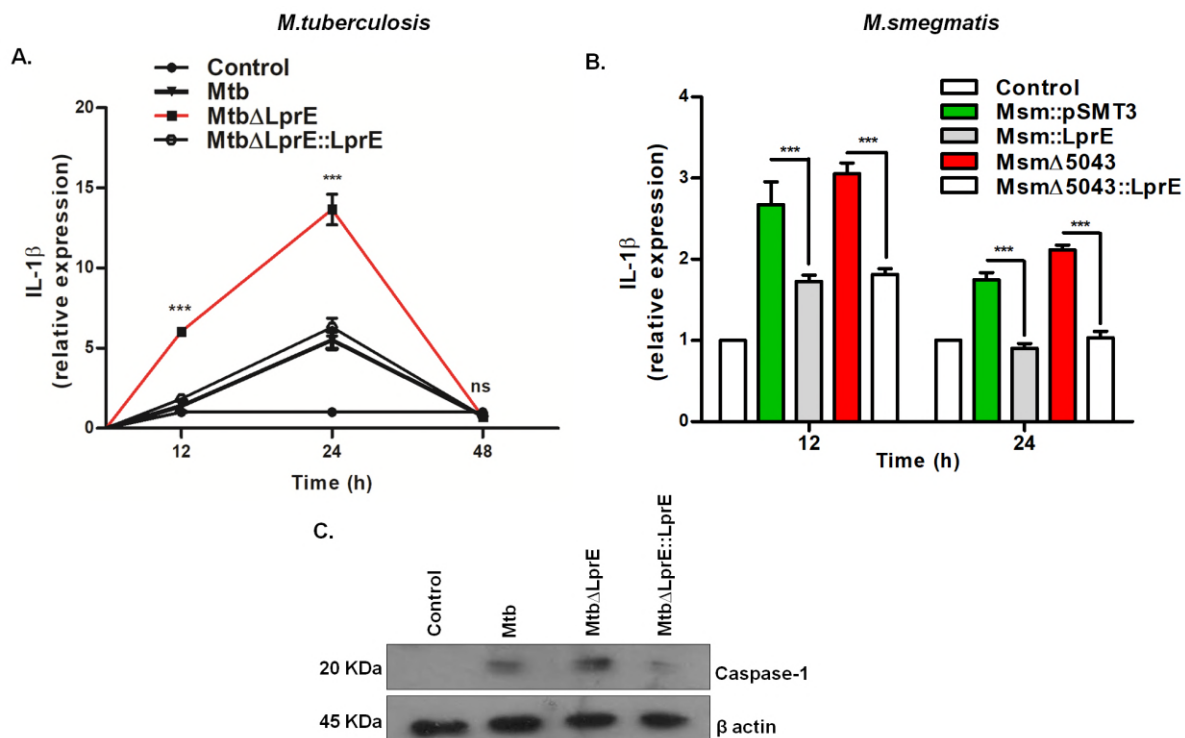

**Fig 5:  $LprE_{Mtb}$  suppresses caspase-1 dependent IL-1 $\beta$  production.** **A.** THP-1 cells infected with *Mtb*, *Mtb $\Delta$ LprE* and *Mtb $\Delta$ LprE::LprE* strains were harvested at the indicated time points to isolate total RNA. qRT-PCR using gene specific primers was performed to determine the expression of IL-1 $\beta$ . **B.** IL-1 $\beta$  expression was determined in THP-1 cells infected with *Msm::pSMT3*, *Msm::LprE*, *Msm $\Delta$ 5043* and *Msm $\Delta$ 5043::LprE* strains after 12 and 24 h of infection. **C.** Western blot to determine the expression of caspase-1 was done using an antibody against cleaved caspase-1 in THP-1 cells infected with *Mtb*, *Mtb $\Delta$ LprE* and *Mtb $\Delta$ LprE::LprE* strains 12 h post infection. Experiments were performed in triplicates. The data is shown from one representative experiment. Mean  $\pm$  SD; \*\*\* for  $P < 0.0001$ ; ns, non-significant.

**Fig 6**

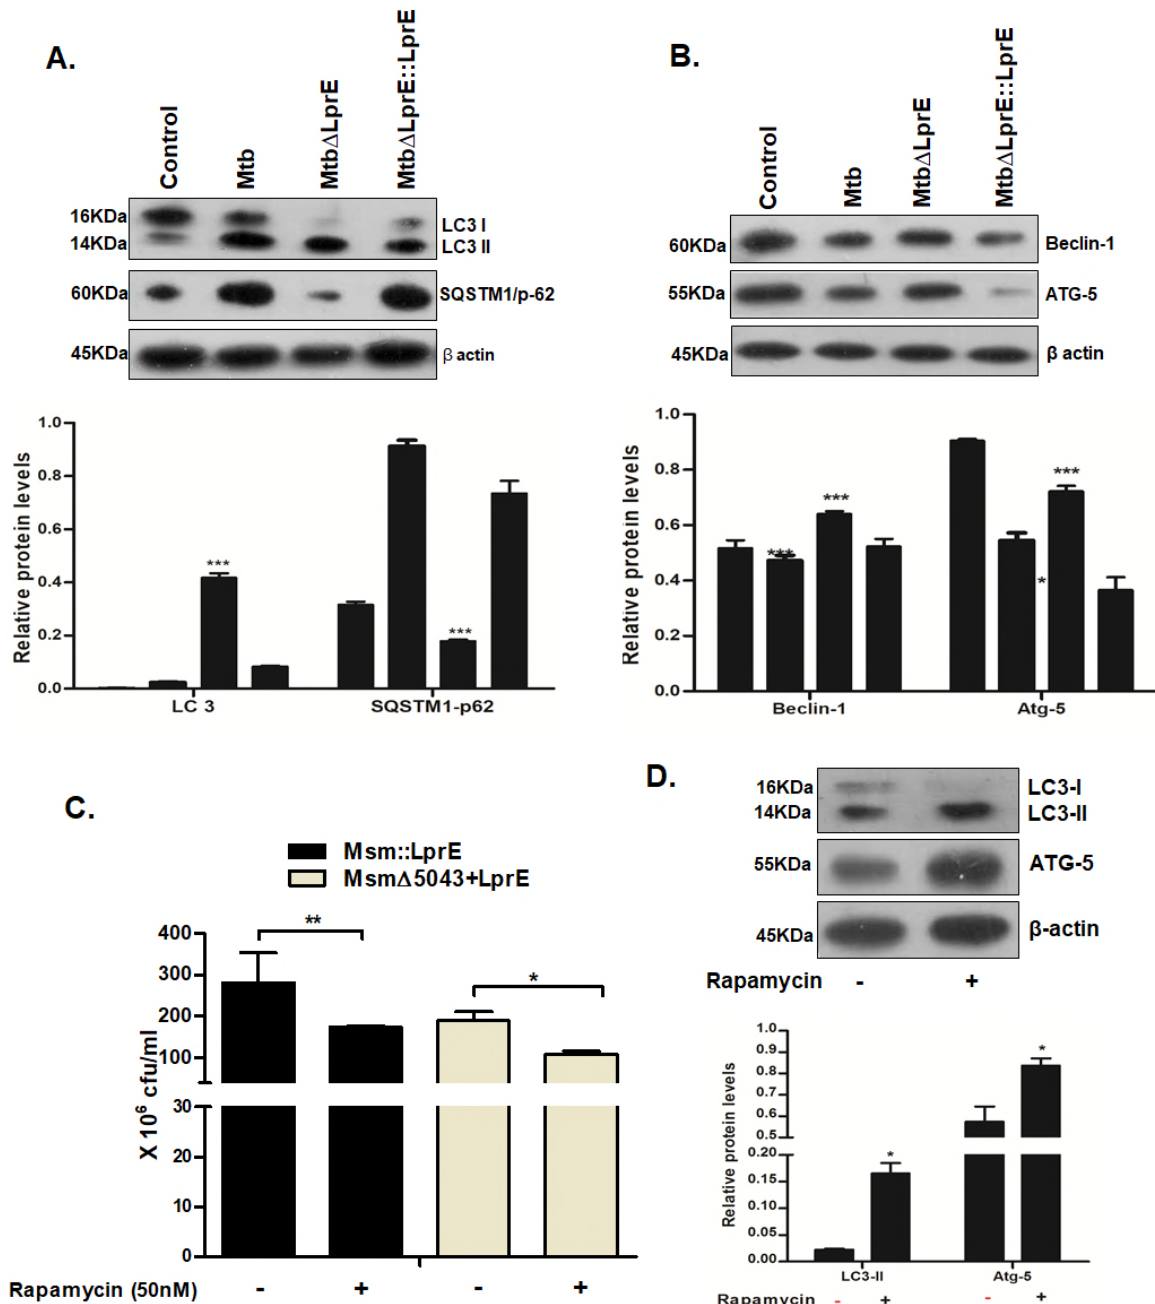

**Fig 6: LprE<sub>Mtb</sub> downregulates autophagy to mediate bacterial survival.** THP-1 cells were infected with *Mtb*, *Mtb* $\Delta$ LprE and *Mtb* $\Delta$ LprE::LprE strains. Infected cells were harvested at respective time points and isolated proteins were analysed by western blotting. Western blot analysis of autophagy related proteins **A.** LC3 and SQSTM1/p62 at 6 h post infection and **B.** Atg-5 and Beclin-1 at 24 h was done using monoclonal antibodies against respective proteins.

Densitometry values were calculated using Image J software to obtain a relative ratio of LC3II/LC3I. LC3II ratio, p62, Atg-5 and beclin-1 levels were normalized to  $\beta$  actin levels. **C.** Intracellular survival of *Msm::LprE* and *Msm $\Delta$ 5043::LprE* 24h post infection in untreated and THP-1 cells pre-treated with rapamycin (50nM) as determined by cfu assay. Rapamycin treatment was confirmed by **D.** LC3II/LC3I ratio and Atg-5 expression. Experiments were performed in triplicates; Mean  $\pm$  SD; \*\*\* for  $P < 0.0001$ , \*\* for  $P < 0.001$ , \* for  $P < 0.05$ ; ns, non-significant.

Fig 7

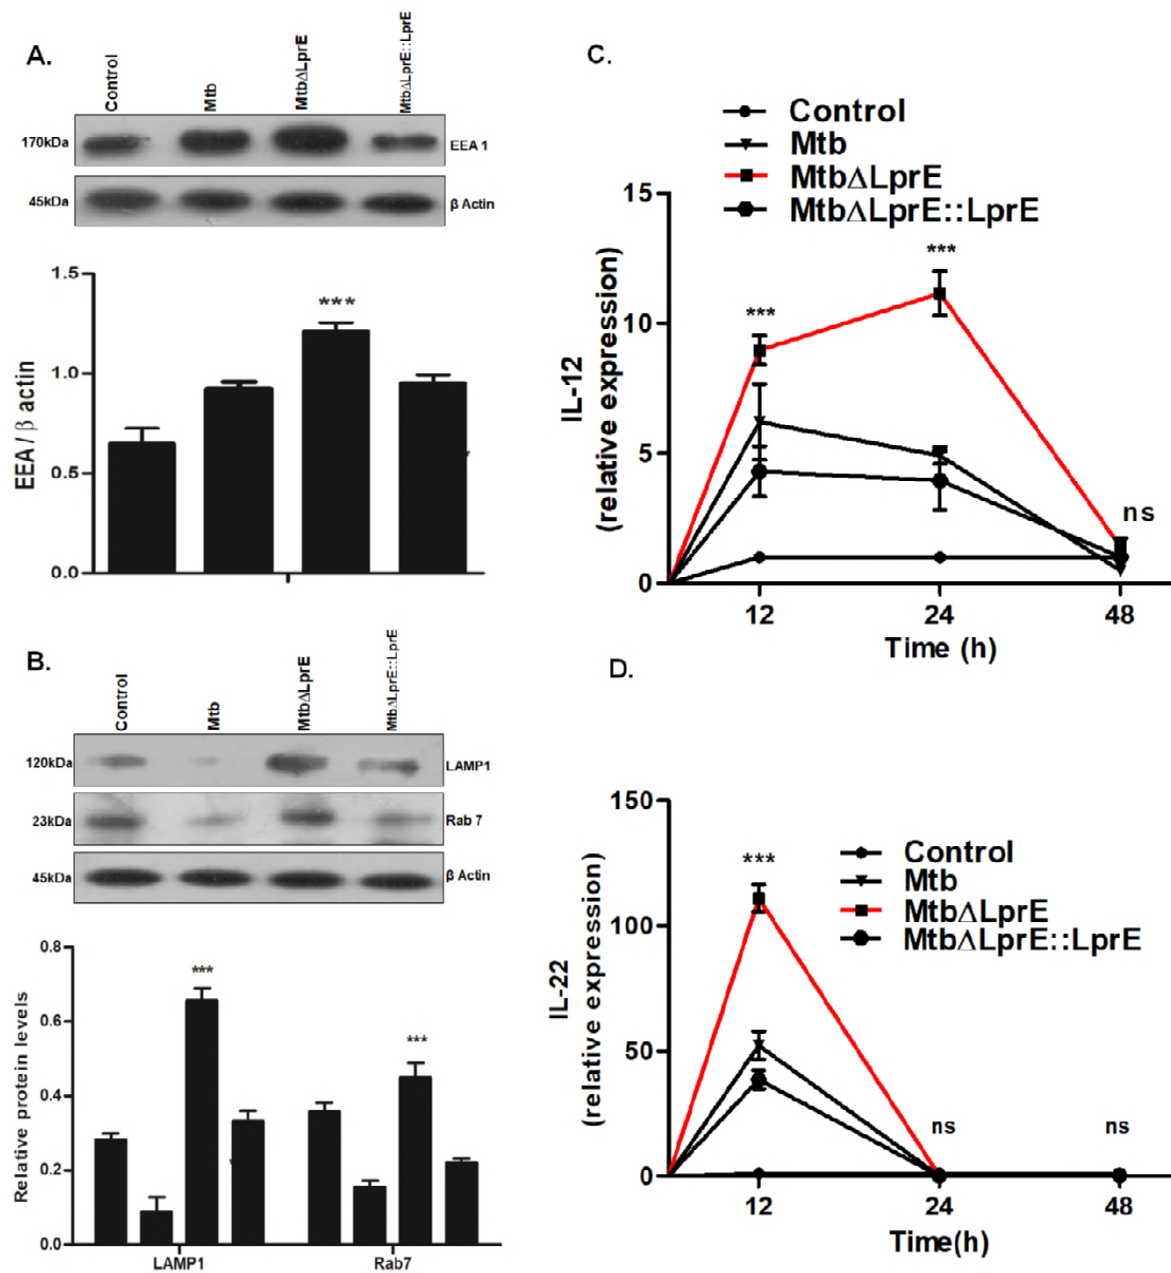

**Fig 7: LprE<sub>Mtb</sub> mediated phagosomal marker downregulation.** THP-1 cells were infected with *Mtb*, *Mtb* $\Delta$ LprE and *Mtb* $\Delta$ LprE::LprE strains for 3 h. Infected cells were harvested and checked for expression of **A.** EEA1 at 6 h, **B.** LAMP1, and Rab7 at 12 h post infection by western blotting. Uninfected cells were used as a control. Relative protein levels were plotted based on densitometry values. Expression of **C.** IL-12 and **D.** IL-22 was checked by qRT-

PCR using gene specific primers at indicated time points. Expression of cytokines in uninfected THP-1 cells was normalized to 1 and fold change in infected cells was plotted. Experiments were performed in triplicates. Mean  $\pm$  SD;\*\*\* for  $P < 0.0001$ , ns, non-significant.

**Fig 8**

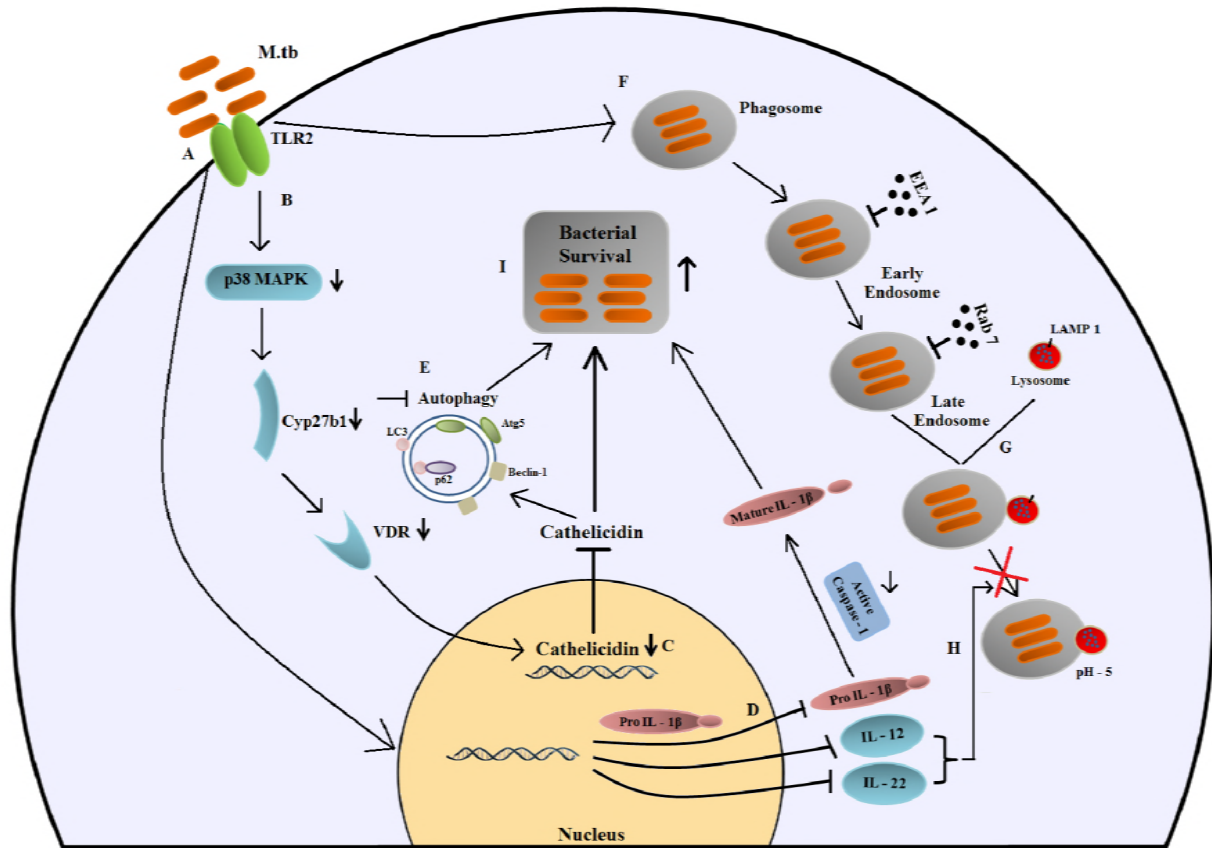

**Fig 8: Schematic representation of  $LprE_{Mtb}$  mediated immune modulation leading to increased bacterial survival in macrophages. A.**  $LprE$  mediates the immune response through interaction with TLR-2 of macrophages, **B.** which then down-regulates expression of p38-Cyp27B1-VDR signalling pathway and **C.** *CAMP* expression leading to increased bacterial survival. **D.**  $LprE_{Mtb}$  mediated down-regulation of antimicrobial action of caspase-1 dependent IL-1 $\beta$ . **E.** Inhibition of autophagic markers leading to increased bacterial survival. **F.**  $LprE_{Mtb}$  inhibits the recruitment of EEA1 and Rab7 to early stages of endosome formation and **G.** LAMP1 recruitment occurs at later stages thus arresting the phago-lysosomal fusion and this arrest is mediated by decreased **H.** IL-12 and IL-22 cytokine levels.



**I.** All these facets of host immune modulation by **LprE<sub>Mtb</sub>** lead to significant increase in intracellular bacterial survival.

## SUPPLEMENTARY FIGURES

### Suppl Fig 1

| Score          | Expect                                                       | Identities    | Gaps      | Strand     |
|----------------|--------------------------------------------------------------|---------------|-----------|------------|
| 1125 bits(609) | 0.0                                                          | 609/609(100%) | 0/609(0%) | Plus/Minus |
| H37Rv LprE     | GTGCCC6GTGTGTGGTCACCACCCTGCCCCACACGCCGCGTGTGGCGTGGTCGCTGCA   | 60            |           |            |
| Mtb CDC1551    | GTGCCC6GTGTGTGGTCACCACCCTGCCCCACACGCCGCGTGTGGCGTGGTCGCTGCA   | 1399332       |           |            |
| H37Rv LprE     | TTGGTCGCCGCGACGTTGACCGGTTGCGGTTGCGGCGACTCCACGGTCGCTAAGACGCCG | 120           |           |            |
| Mtb CDC1551    | TTGGTCGCCGCGACGTTGACCGGTTGCGGTTGCGGCGACTCCACGGTCGCTAAGACGCCG | 1399272       |           |            |
| H37Rv LprE     | GAGGCCACCCCATCCCTGTCAACTGCTCACCCGGCCCCCGAGCAGCGAACCAGCCCCG   | 180           |           |            |
| Mtb CDC1551    | GAGGCCACCCCATCCCTGTCAACTGCTCACCCGGCCCCCGAGCAGCGAACCAGCCCCG   | 1399212       |           |            |
| H37Rv LprE     | CCGTCCGCGACAGCTGCCCCACCCAGCAACCACAGCGCCGCGCCGGTCGACCCGTGTGCG | 240           |           |            |
| Mtb CDC1551    | CCGTCCGCGACAGCTGCCCCACCCAGCAACCACAGCGCCGCGCCGGTCGACCCGTGTGCG | 1399152       |           |            |
| H37Rv LprE     | GTGAACCTCGCCTCGCCACAATCGCCAAAGTCGTCTCCGAACTTCCTCGCGATCCGCGC  | 300           |           |            |
| Mtb CDC1551    | GTGAACCTCGCCTCGCCACAATCGCCAAAGTCGTCTCCGAACTTCCTCGCGATCCGCGC  | 1399092       |           |            |
| H37Rv LprE     | AGTGAGCAGCCCTGGAACCCAGAACCCTGGCCGGCAACTACAACGAGTGTGCCAGCTG   | 360           |           |            |
| Mtb CDC1551    | AGTGAGCAGCCCTGGAACCCAGAACCCTGGCCGGCAACTACAACGAGTGTGCCAGCTG   | 1399032       |           |            |
| H37Rv LprE     | TCGGCGGTGGTCATCAAGGCCAACACGAACGCCGGCAATCCGACCACCCGCGCGGTGATG | 420           |           |            |
| Mtb CDC1551    | TCGGCGGTGGTCATCAAGGCCAACACGAACGCCGGCAATCCGACCACCCGCGCGGTGATG | 1398972       |           |            |
| H37Rv LprE     | TTCCACCTCGGCAAGTACATAACCGCAGGGGGTGCCTGATACCTATGGGTTACCGGCATC | 480           |           |            |
| Mtb CDC1551    | TTCCACCTCGGCAAGTACATAACCGCAGGGGGTGCCTGATACCTATGGGTTACCGGCATC | 1398912       |           |            |
| H37Rv LprE     | GACACCTCGCAGTGCACGGGAGACACGGTGGCATTGACGTATGCCAGCGGCATCGGGTTG | 540           |           |            |
| Mtb CDC1551    | GACACCTCGCAGTGCACGGGAGACACGGTGGCATTGACGTATGCCAGCGGCATCGGGTTG | 1398852       |           |            |
| H37Rv LprE     | AACAACGTTGTCAAGTTCGCTGGAACGGCGGCGGCGTGCAGCTGATCGGCAACACCACC  | 600           |           |            |
| Mtb CDC1551    | AACAACGTTGTCAAGTTCGCTGGAACGGCGGCGGCGTGCAGCTGATCGGCAACACCACC  | 1398792       |           |            |
| H37Rv LprE     | GGCGGTAA                                                     | 609           |           |            |
| Mtb CDC1551    | GGCGGTAA                                                     | 1398783       |           |            |

Suppl Fig 1: Multiple sequence alignment of *Mtb* H37Rv and CDC1551 LprE.

## Suppl Fig 2

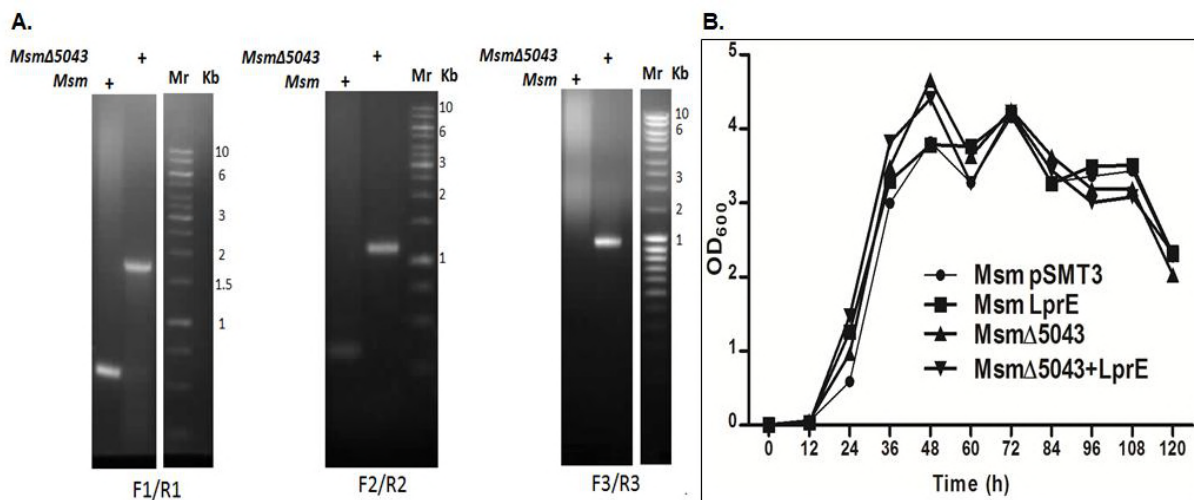

**Suppl Fig 2: A.** Disruption of *LprE<sub>Mtb</sub>* at a native locus was confirmed by performing PCRs using gene specific primers (F1/R1), beyond flank forward (F2) with Hygromycin reverse (R2) and Hygromycin forward (F3) with beyond flank reverse (R3). Genomic DNA from *Msm* (Lane 1) and *MsmΔ5043* (Lane 2) were used as a template. Mr represents 1 kb gene ruler ladder. **B.** *In vitro* growth curve of *Msm::pSMT3*, *Msm::LprE*, *MsmΔ5043* and *MsmΔ5043::LprE* was determined by growing bacteria in 7H9 medium and measuring optical density at  $A_{600}$  nm.

### Suppl Fig 3

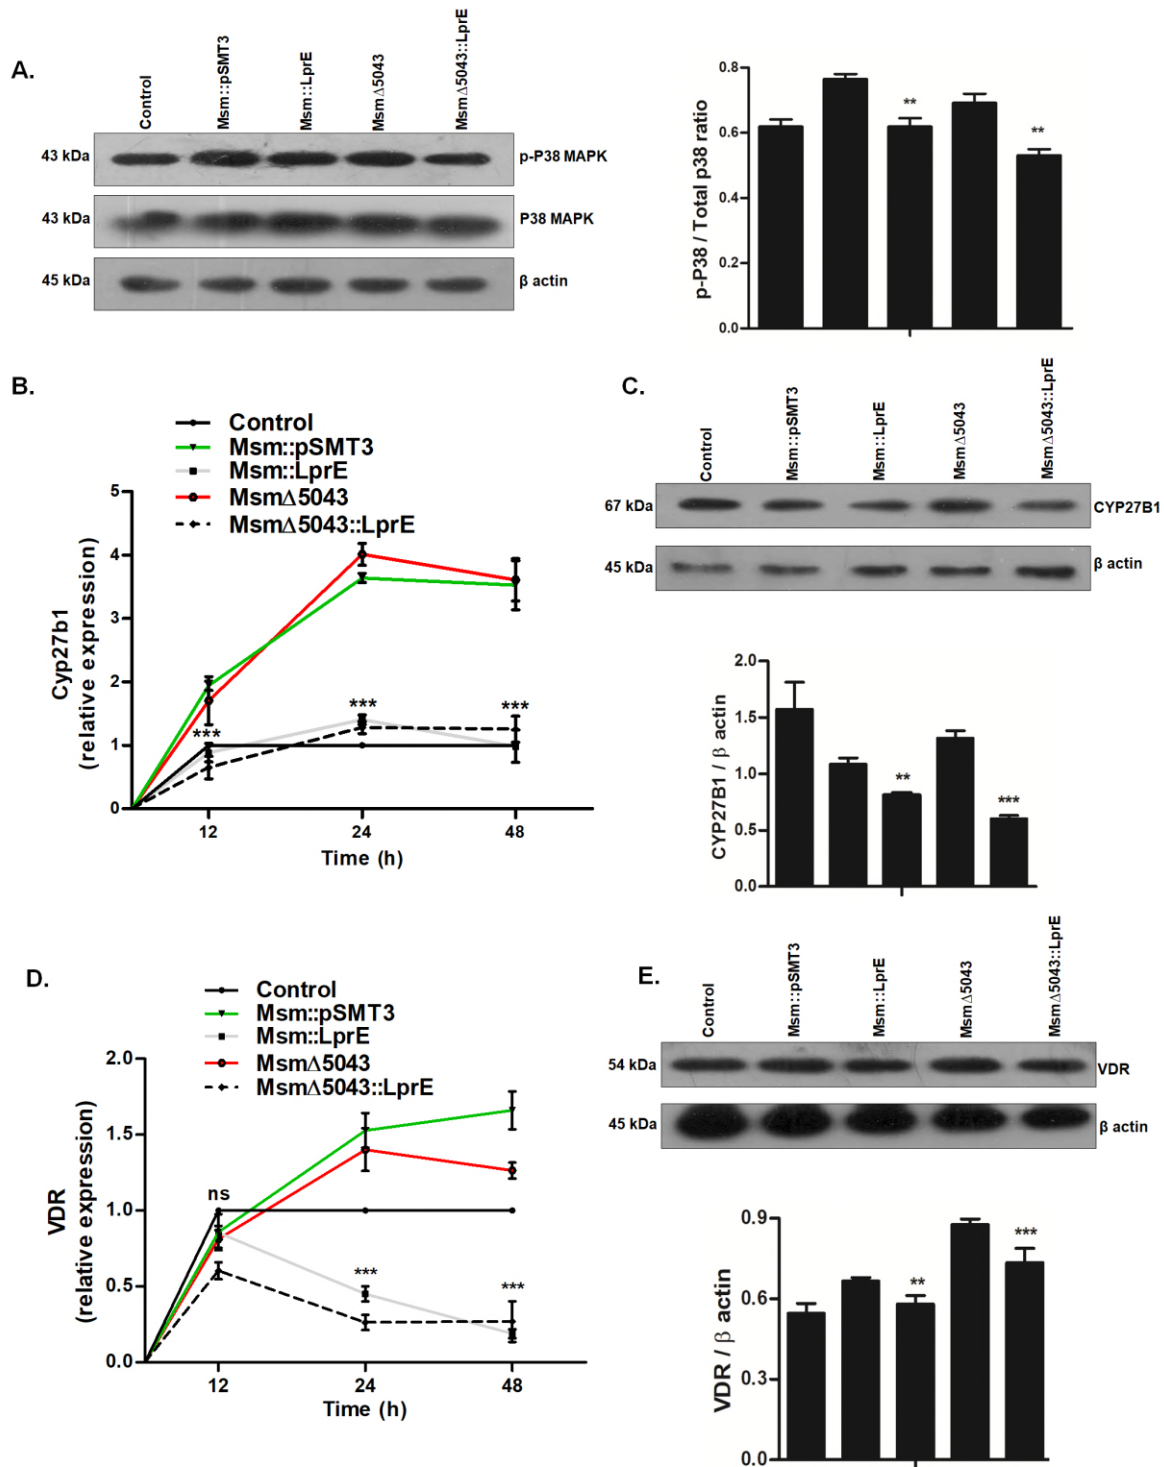

**Suppl Fig 3: LprE<sub>Mtb</sub> overexpression in *Msm* mediates cathelicidin downregulation through p38–Cyp27B1–VDR pathway.** THP-1 cells were infected with *Msm::pSMT3*, *Msm::LprE*, *MsmΔ5043* and *MsmΔ5043::LprE* strains. **A.** Western blot analysis of phospho-

p38 MAPK expression was performed using anti-p38 antibody 6 h post infection. Expression of *CYP27B1* in *Msm::pSMT3* infected THP-1 cells was determined 24 h post infection at **B.** transcriptional level by qRT-PCR and **C.** translational level by western blotting. Expression of VDR at **D.** transcriptional and **E.** translational level was determined by qRT-PCR and Western blotting, respectively in infected THP-1 cells. Experiments were performed in triplicates; Mean  $\pm$  SD; \*\*\* for  $P < 0.0001$ , \*\* for  $P < 0.001$ ; ns, non-significant.

## Suppl Fig 4

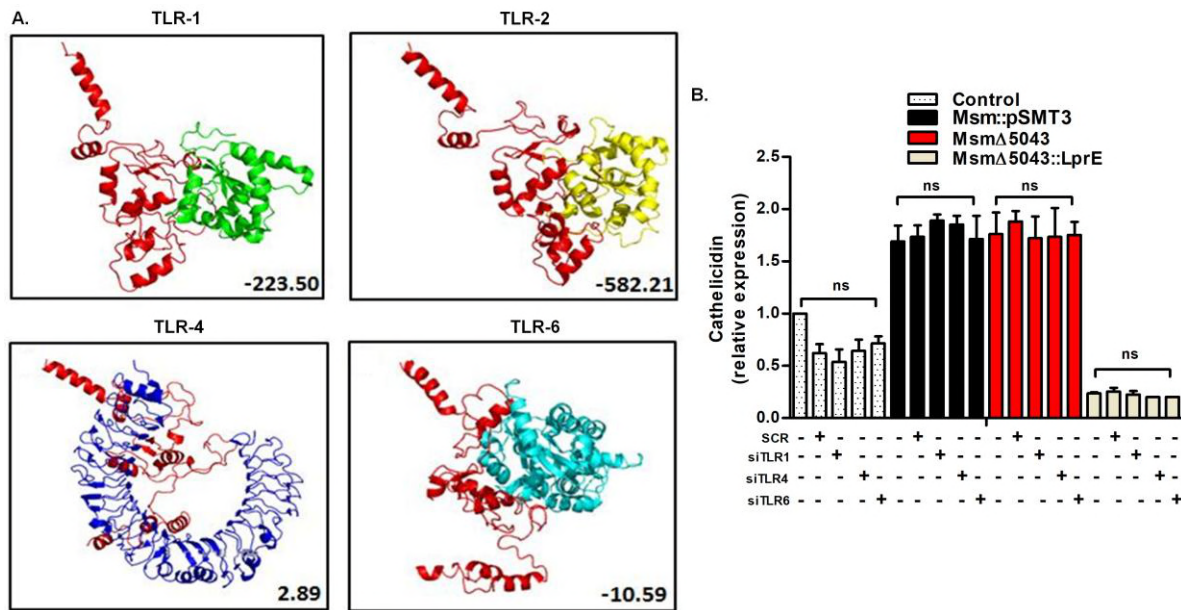

**Suppl Fig 4: A.** *In-silico* docking of energy minimized structure of LprE<sub>Mtb</sub> with human TLR-1, TLR-2, TLR-4, and TLR-6. Numbers mentioned below in respective boxes indicate atomic contact energy (ACE) score obtained from PatchDock analysis **B.** Cathelicidin (*CAMP*) expression was checked by qRT-PCR in untreated, scrambled and si RNA against TLR-1/4/6 treated cells. Experiments were performed in triplicates; ns, non-significant.



## Suppl Fig 5

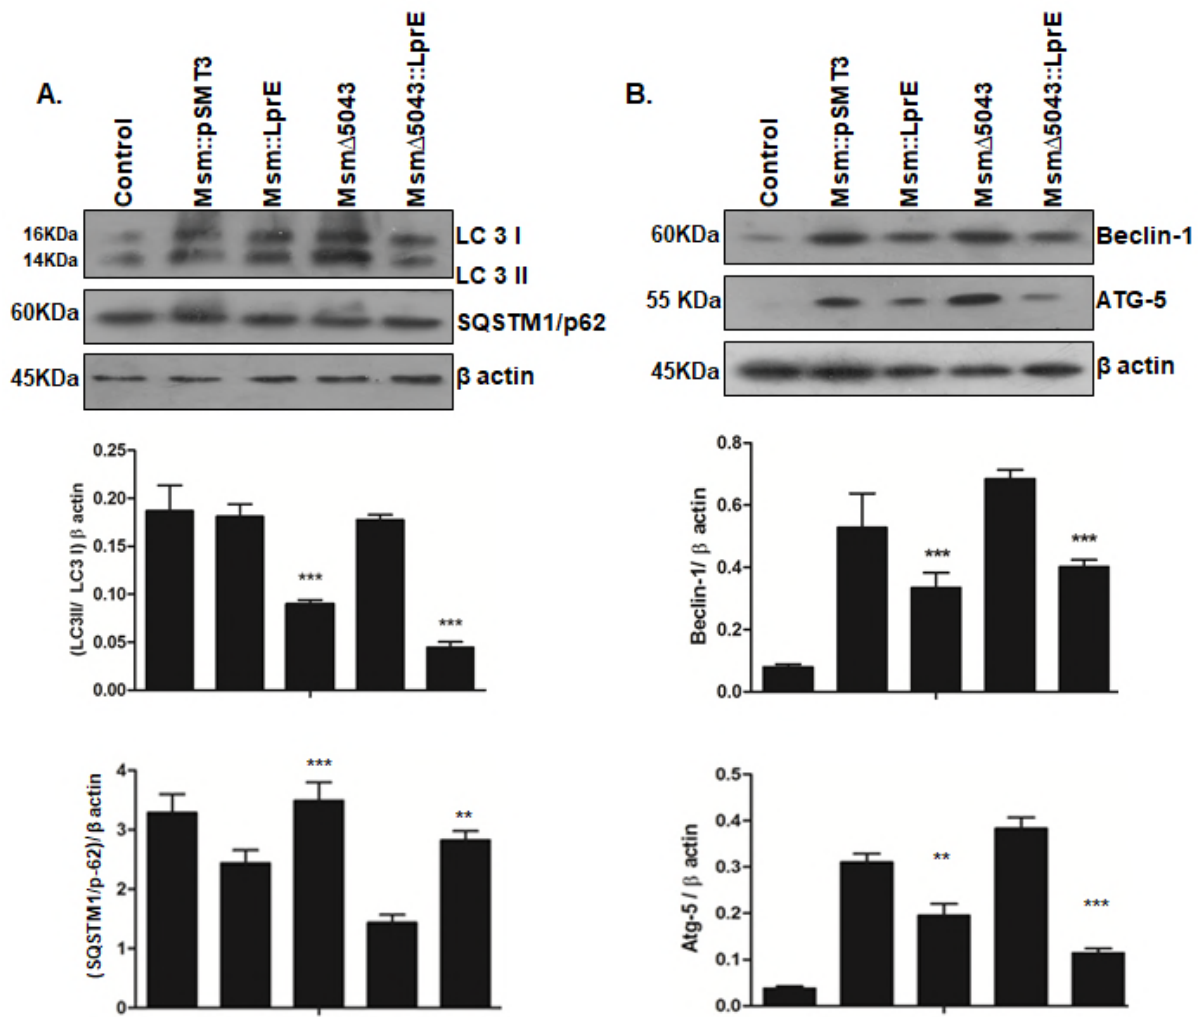

**Suppl Fig 5:** THP-1 cells were infected *Msm::pSMT3*, *Msm::LprE*, *Msm $\Delta$ 5043* and *Msm $\Delta$ 5043::LprE* strains. Western blotting analysis of **A.** LC3, SQSTM1/p62 at 6 h and **B.** Atg-5, Beclin-1 was done at 24 h post infection. Quantitative densitometry of expression was done using Image J software under baseline conditions. The expression values were normalized with  $\beta$  actin in western blotting. The blots are representative of three independent experiments ; Mean  $\pm$  SD; \*\*\* for  $P < 0.0001$ , \*\* for  $P < 0.001$ ; ns, non-significant.

## Suppl Fig 6

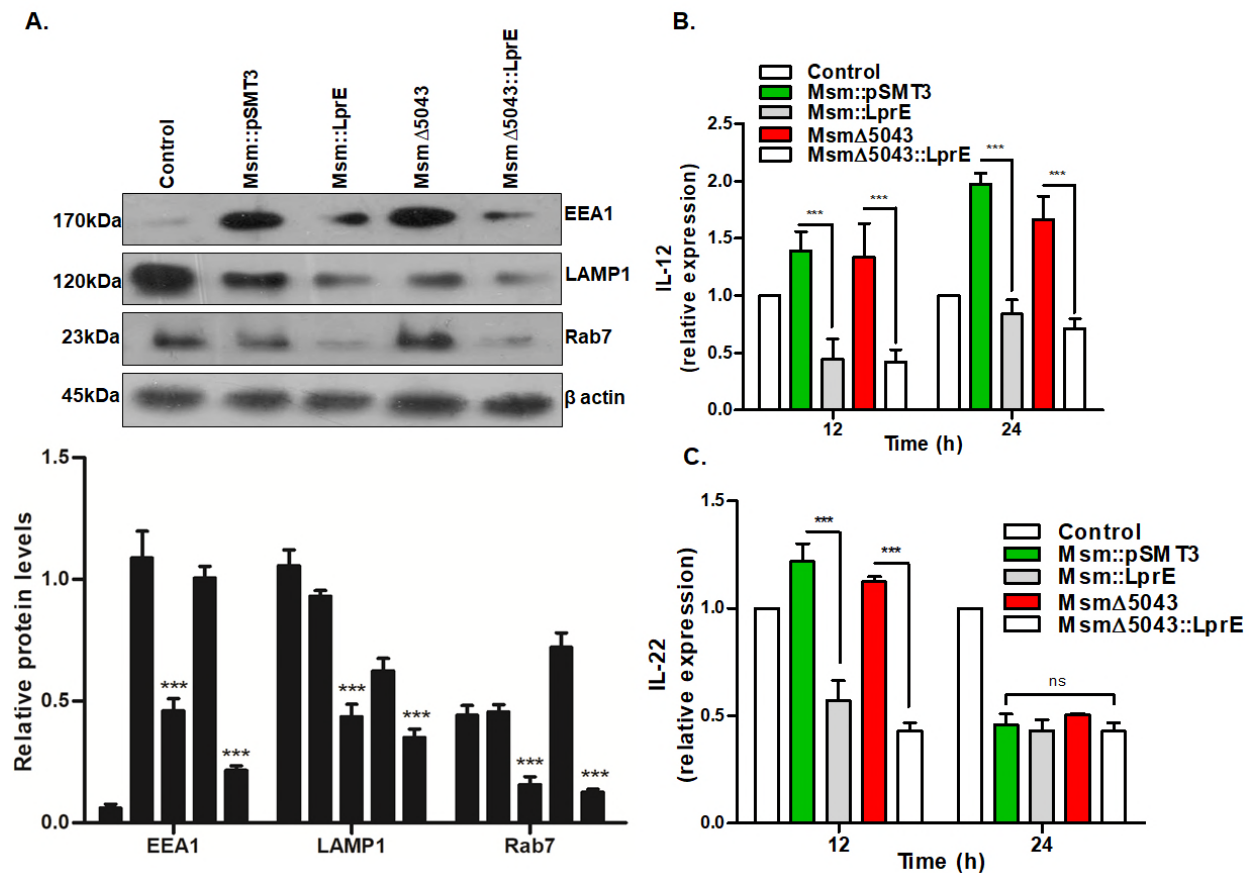

**Suppl Fig 6:** THP-1 cells were infected with *Msm::pSMT3*, *Msm::LprE*, *MsmΔ5043*, and *MsmΔ5043::LprE* strains. Infected cells were harvested to isolate proteins and total RNA. **A.** Western blotting was done to check for expression of EEA1, Rab7, and LAMP1. Un-infected cells were taken as a control, and densitometry of protein levels relative to  $\beta$  actin was plotted (below). RNA isolated at indicated time points was converted to cDNA and the expression of **B.** IL-12 and **C.** IL-22 was checked by qRT-PCR. The expression levels were normalized against GAPDH as the house keeping gene. Experiments were performed in triplicates. Mean  $\pm$  SD; \*\*\* for  $P < 0.0001$ , ns, non-significant.
